# Supplementary material for: Ionic liquid-promoted one-pot synthesis of thiazole–imidazo[2,1-b][1,3,4]thiadiazole hybrids and their antitubercular activity
Source: Royal Society of Chemistry journal article supplement (doi:10.1039/c5md00346f), 2015-12-14
Supplement: c5md00346f1.pdf [file c5md00346f1.pdf]

## Supporting information

### Ionic liquid promoted one-pot synthesis of thiazole-imidazo[2,1-*b*] [1,3,4]thiadiazole hybrids and their antitubercular activity

Jurupula Ramprasad<sup>a</sup>, Nagabhushana Nayak<sup>a</sup>, Udayakumar Dalimba<sup>a,\*</sup>, Perumal Yogeeswari<sup>b</sup>  
and Dharmarajan Sriram<sup>b</sup>

<sup>a</sup>*Organic Chemistry Laboratory, Department of Chemistry, National Institute of Technology Karnataka, Surathkal, Srinivasanagar, Mangalore-575025, India.*

<sup>b</sup>*Medicinal Chemistry and Drug Discovery Research Laboratory, Pharmacy Group, Birla Institute of Technology and Science-Pilani, Hyderabad Campus, Jawahar Nagar, Telangana State-500078, India.*

\*Corresponding author email: udayaravi80@gmail.com, udayakumar@nitk.ac.in Phone: +91-824-2473207. Fax: +91-824-2474033

## Experimental

The required solvents and raw materials were purchased from Merck, Loba Chemie Sigma Aldrich and Spectrochem Chemicals Pvt.Ltd. The progress of the reaction was monitored by TLC using pre coated aluminum sheets with 60 F254 silica gel (Merck KGaA). The Stuart SMP3 apparatus was used for recording the melting point of synthesized compounds. <sup>1</sup>H NMR spectra of the compounds were recorded using a Bruker 400 MHz NMR spectrometer using TMS as the internal standard. <sup>13</sup>C NMR spectra of the compounds were recorded using a Bruker 100 MHz NMR spectrometer. Elemental analysis was done using a Thermo electron corporation EA-112 series C, H, N, S analyzer. Mass spectra were recorded using a Waters micro mass Q-Tofmicro spectrometer with an ESI source.

**Table S1.** Optimization of reaction conditions for the one-pot synthesis of **5e**.

| Entry | Solvent system       | T (° C) | Time (h) | Isolated yield (%) |
|-------|----------------------|---------|----------|--------------------|
| 1     | Ethanol              | r.t.    | 18       | -                  |
| 2     | Ethanol              | 50      | 18       | 10                 |
| 3     | Ethanol              | 80      | 18       | 15                 |
| 4     | [Bmim]Br and ethanol | r.t.    | 12       | 40                 |
| 5     | [Bmim]Br and ethanol | 50      | 02       | 62                 |
| 6     | [Bmim]Br and ethanol | 80      | 0.5      | 90                 |

**Table S2.** The structural features, reaction time and yield of the target compounds (**5a-w**).

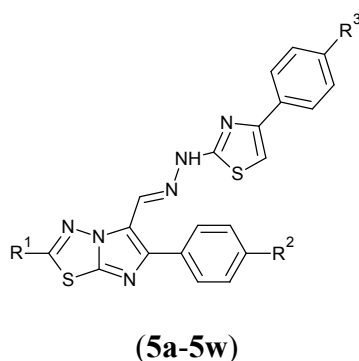

| Entry | R <sup>1</sup>  | R <sup>2</sup>   | R <sup>3</sup>   | Time<br>(min) | Yield<br>(%) |
|-------|-----------------|------------------|------------------|---------------|--------------|
| 5a    | CH <sub>3</sub> | CH <sub>3</sub>  | CH <sub>3</sub>  | 45            | 85           |
| 5b    | CH <sub>3</sub> | CH <sub>3</sub>  | OCH <sub>3</sub> | 40            | 88           |
| 5c    | CH <sub>3</sub> | CH <sub>3</sub>  | Cl               | 30            | 90           |
| 5d    | CH <sub>3</sub> | CH <sub>3</sub>  | NO <sub>2</sub>  | 30            | 89           |
| 5e    | CH <sub>3</sub> | CH <sub>3</sub>  | F                | 30            | 90           |
| 5f    | CH <sub>3</sub> | OCH <sub>3</sub> | CH <sub>3</sub>  | 40            | 84           |
| 5g    | CH <sub>3</sub> | OCH <sub>3</sub> | OCH <sub>3</sub> | 40            | 80           |
| 5h    | CH <sub>3</sub> | OCH <sub>3</sub> | Cl               | 30            | 85           |
| 5i    | CH <sub>3</sub> | OCH <sub>3</sub> | NO <sub>2</sub>  | 30            | 88           |
| 5j    | CH <sub>3</sub> | OCH <sub>3</sub> | F                | 30            | 85           |
| 5k    | CH <sub>3</sub> | Cl               | CH <sub>3</sub>  | 30            | 83           |
| 5l    | CH <sub>3</sub> | Cl               | OCH <sub>3</sub> | 30            | 87           |
| 5m    | CH <sub>3</sub> | Cl               | Cl               | 30            | 94           |
| 5n    | CH <sub>3</sub> | Cl               | F                | 30            | 88           |
| 5o    | CF <sub>3</sub> | OCH <sub>3</sub> | CH <sub>3</sub>  | 45            | 82           |
| 5p    | CF <sub>3</sub> | OCH <sub>3</sub> | OCH <sub>3</sub> | 45            | 82           |
| 5q    | CF <sub>3</sub> | OCH <sub>3</sub> | Cl               | 35            | 82           |
| 5r    | CF <sub>3</sub> | OCH <sub>3</sub> | F                | 35            | 84           |
| 5s    | CF <sub>3</sub> | Cl               | CH <sub>3</sub>  | 35            | 88           |
| 5t    | CF <sub>3</sub> | Cl               | OCH <sub>3</sub> | 35            | 86           |
| 5u    | CF <sub>3</sub> | Cl               | Cl               | 30            | 94           |
| 5v    | CF <sub>3</sub> | Cl               | NO <sub>2</sub>  | 30            | 96           |
| 5w    | CF <sub>3</sub> | Cl               | F                | 30            | 95           |

## General procedure for the synthesis of target molecules 5a-5w

A mixture of imidazo[2,1-*b*][1,3,4]thiadiazole-5-carbaldehyde (1 mmol), thiosemicarbazide (1 mmol) and the corresponding phenacyl bromide (1 mmol) was taken in ethanol (10 mL) in a dry 50 mL RBF. To this mixture ionic liquid [bmim]Br (2 mL) was added and the resulting mixture was stirred at 80 °C for 30-45 minutes. After the completion of the reaction (as monitored by TLC), water (10 mL) was added to the reaction mixture. The separated solid was filtered off and washed with water. The product was then recrystallized from ethanol.

**1-((2-methyl-6-*p*-tolylimidazo[2,1-*b*][1,3,4]thiadiazol-5-yl)methylene)-2-(4-*p*-tolylthiazol-2-yl)hydrazine (5a):** Light yellow solid; m.p. 241-242 °C; <sup>1</sup>H NMR (400 MHz, DMSO-*d*<sub>6</sub>) δ (ppm): 12.28 (s, 1H, -NH), 8.43 (s, 1H, -CH), 8.32 – 8.24 (m, 2H, Ar-H), 8.15 – 8.07 (m, 2H, Ar-H), 7.86 – 7.79 (m, 2H, Ar-H), 7.74 (s, 1H, Ar-H), 7.33 (d, *J* = 7.9 Hz, 2H, Ar-H), 2.81 (s, 3H, CH<sub>3</sub>), 2.39 (s, 3H, CH<sub>3</sub>), 2.32 (s, 3H, CH<sub>3</sub>); <sup>13</sup>C NMR (100 MHz, DMSO-*d*<sub>6</sub>) δ (ppm): 168.8, 161.7, 149.8, 147.3, 146.7, 145.3, 142.1, 138.0, 131.3, 131.0, 129.5, 128.4, 126.8, 123.6, 119.2, 105.3, 21.3, 21.2, 18.2; ESI-MS (*m/z*) = 445.4 (*M* + 1); anal. calcd (%) for C<sub>23</sub>H<sub>20</sub>N<sub>6</sub>S<sub>2</sub>: C, 62.14; H, 4.53; N, 18.90; S, 14.43. Found: C, 62.08; H, 4.58; N, 18.95; S, 14.38.

**1-(4-(4-methoxyphenyl)thiazol-2-yl)-2-((2-methyl-6-*p*-tolylimidazo[2,1-*b*][1,3,4]thiadiazol-5-yl)methylene)hydrazine (5b):** Yellow solid; m.p. 239-240 °C; <sup>1</sup>H NMR (400 MHz, DMSO-*d*<sub>6</sub>) δ (ppm): 12.13 (s, 1H, -NH), 8.41 (s, 1H, -CH), 7.83-7.78 (m, 2H, Ar-H), 7.74 (s, 1H, Ar-H), 7.50-7.42 (m, 2H, Ar-H), 7.38 (d, *J* = 7.8 Hz, 2H, Ar-H), 7.34-7.28 (m, 2H, Ar-H), 3.73 (s, 3H, OCH<sub>3</sub>), 2.81 (s, 3H, CH<sub>3</sub>), 2.39 (s, 3H, CH<sub>3</sub>); <sup>13</sup>C NMR (100 MHz, DMSO-*d*<sub>6</sub>) δ (ppm): 168.5, 161.5, 150.2, 147.1, 145.1, 138.0, 130.2, 130.9, 129.5, 128.4, 128.1, 127.8, 119.2, 116.1, 115.8, 104.2, 55.7, 21.3, 18.2; ESI-MS (*m/z*) = 461.1 (*M* + 1); anal. calcd (%) for C<sub>23</sub>H<sub>20</sub>N<sub>6</sub>OS<sub>2</sub>: C, 59.98; H, 4.38; N, 18.25; S, 13.92. Found: C, 60.04; H, 4.36; N, 18.28; S, 13.98.

**1-(4-(4-chlorophenyl)thiazol-2-yl)-2-((2-methyl-6-*p*-tolylimidazo[2,1-*b*][1,3,4]thiadiazol-5-yl)methylene)hydrazine (5c):** Light green solid; m.p. 249-250 °C; <sup>1</sup>H NMR (400 MHz, DMSO-*d*<sub>6</sub>) δ (ppm): 12.13 (s, 1H, -NH), 8.43 (s, 1H, -CH), 7.92 – 7.78 (m, 4H, Ar-H), 7.33 – 7.16 (m, 5H, Ar-H), 2.81 (s, 3H, CH<sub>3</sub>), 2.37 (s, 3H, CH<sub>3</sub>); <sup>13</sup>C NMR (100 MHz, DMSO-*d*<sub>6</sub>) δ (ppm): 168.5, 161.5, 148.2, 146.3, 144.1, 137.0, 131.3, 130.7, 129.3, 128.5, 128.0, 127.9, 119.2, 116.0, 115.8, 103.2, 21.3, 18.2; ESI-MS (*m/z*) = 464.0 (*M* + 1); anal. calcd (%) for

C<sub>22</sub>H<sub>17</sub>ClN<sub>6</sub>S<sub>2</sub>: C, 56.83; H, 3.68; N, 18.07; S, 13.79. Found: C, 56.88; H, 3.66; N, 18.10; S, 13.78.

**1-((2-methyl-6-p-tolylimidazo[2,1-b][1,3,4]thiadiazol-5-yl)methylene)-2-(4-(4-nitrophenyl)thiazol-2-yl)hydrazine (5d):** Yellow solid; m.p. 257-258 °C; <sup>1</sup>H NMR (400 MHz, DMSO-*d*<sub>6</sub>) δ (ppm): 12.28 (s, 1H, -NH), 8.43 (s, 1H, -CH), 8.32 – 8.24 (m, 2H, Ar-H), 8.15 – 8.07 (m, 2H, Ar-H), 7.86 – 7.79 (m, 2H, Ar-H), 7.74 (s, 1H, Ar-H), 7.33 (d, *J* = 7.9 Hz, 2H, Ar-H), 2.81 (s, 3H, CH<sub>3</sub>), 2.39 (s, 3H, CH<sub>3</sub>); <sup>13</sup>C NMR (100 MHz, DMSO-*d*<sub>6</sub>) δ (ppm): 168.8, 161.7, 148.8, 147.3, 146.6, 145.3, 141.0, 138.0, 131.3, 131.0, 129.5, 128.4, 126.8, 124.5, 119.2, 109.3, 21.3, 18.2; ESI-MS (*m/z*):= 475.90 (*M* + 1); anal. calcd (%) for C<sub>12</sub>H<sub>17</sub>N<sub>7</sub>O<sub>2</sub>S<sub>2</sub>: C, 55.56; H, 3.60; N, 20.62; S, 13.49. Found: C, 55.49; H, 3.58; N, 20.55; S, 13.38.

**1-(4-(4-fluoro phenyl)thiazol-2-yl)-2-((2-methyl-6-p-tolyl imidazo[2,1-b][1,3,4] thiadiazol-5-yl) methylene)hydrazine (5e):** Off white solid; m.p. 244-246 °C; <sup>1</sup>H NMR (400 MHz, DMSO-*d*<sub>6</sub>) δ (ppm): 12.14 (s, 1H, -NH), 8.41 (s, 1H, -CH), 7.93 – 7.81 (m, 4H, Ar-H), 7.31 (t, *J* = 3.9 Hz, 3H, Ar-H), 7.24 (t, *J* = 8.9 Hz, 2H, Ar-H), 2.80 (s, 3H, CH<sub>3</sub>), 2.38 (s, 3H, CH<sub>3</sub>); <sup>13</sup>C NMR (100 MHz, DMSO-*d*<sub>6</sub>) δ (ppm): 168.5, 161.7, 149.3, 147.2, 145.1, 138.0, 131.2, 130.9, 129.5, 128.4, 128.0, 128.0, 119.2, 116.0, 115.8, 104.2, 21.3, 18.2; ESI-MS (*m/z*):= 449.0 (*M* + 1); anal. calcd (%) for C<sub>12</sub>H<sub>17</sub>FN<sub>6</sub>S<sub>2</sub>: C, 58.91; H, 3.82; N, 18.74; S, 14.30. Found: C, 58.89; H, 3.78; N, 18.50; S, 14.32.

**1-((6-(4-methoxyphenyl)-2-methylimidazo[2,1-b][1,3,4]thiadiazol-5-yl)methylene)-2-(4-p-tolyl thiazol-2-yl)hydrazine (5f):** Brown solid; m.p. 236-237 °C; <sup>1</sup>H NMR (400 MHz, DMSO-*d*<sub>6</sub>) δ (ppm): 12.24 (s, 1H, -NH), 8.41 (s, 1H, -CH), 7.92 – 7.79 (m, 4H, Ar-H), 7.34 – 7.18 (m, 5H, Ar-H), 3.84 (s, 3H, OCH<sub>3</sub>), 2.80 (s, 3H, CH<sub>3</sub>), 2.38 (s, 3H, CH<sub>3</sub>); <sup>13</sup>C NMR (100 MHz, DMSO-*d*<sub>6</sub>) δ (ppm): 168.5, 161.7, 149.3, 147.2, 145.1, 138.0, 131.2, 130.9, 129.5, 128.4, 128.0, 127.9, 119.2, 116.0, 115.8, 104.2, 55.8, 21.3, 18.2; ESI-MS (*m/z*):= 461.2 (*M* + 1); anal. calcd (%) for C<sub>23</sub>H<sub>20</sub>N<sub>6</sub>OS<sub>2</sub>: C, 59.98; H, 4.38; N, 18.25; S, 13.92. Found: C, 59.91; H, 4.39; N, 18.30; S, 13.88.

**1-((6-(4-methoxyphenyl)-2-methylimidazo[2,1-b][1,3,4]thiadiazol-5-yl)methylene)-2-(4-(4-methoxyphenyl)thiazol-2-yl)hydrazine (5g):** Light brown solid; m.p. 243-245 °C; <sup>1</sup>H NMR (400 MHz, DMSO-*d*<sub>6</sub>) δ (ppm): 12.29 (s, 1H, -NH), 8.42 (s, 1H, -CH), 7.84 (d, *J* = 8.8 Hz, 2H, Ar-H), 7.78 (d, *J* = 7.6 Hz, 2H, Ar-H), 7.19 (s, 1H, Ar-H), 7.11 (d, *J* = 7.4 Hz, 2H, Ar-H), 6.97 (d, *J* = 9.2 Hz, 2H, Ar-H), 3.85 (s, 3H, OCH<sub>3</sub>), 3.78 (s, 3H, OCH<sub>3</sub>); <sup>13</sup>C NMR (100 MHz, DMSO-*d*<sub>6</sub>) δ (ppm): 168.3, 160.1, 159.3, 144.3, 149.9, 147.1, 146.7, 130.4, 130.0,

127.4, 127.3, 119.7, 118.8, 115.3, 114.6, 102.5, 55.7, 55.6, 18.2; ESI-MS ( $m/z$ ):= 477.4 ( $M + 1$ ); anal. calcd (%) for  $C_{23}H_{20}N_6O_2S_2$ : C, 57.97; H, 4.23; N, 17.63; S, 13.46. Found: C, 57.91; H, 4.29; N, 17.40; S, 13.58.

**1-(4-(4-chlorophenyl)thiazol-2-yl)-2-((6-(4-methoxyphenyl)-2-methylimidazo[2,1-b][1,3,4]thiadiazol-5-yl)methylene)hydrazine (5h):** Off white solid; m.p. 203-204 °C;  $^1H$  NMR (400 MHz, DMSO- $d_6$ )  $\delta$  (ppm): 12.09 (s, 1H, -NH), 8.40 (s, 1H, -CH), 7.94 – 7.80 (m, 4H, Ar-H), 7.50 – 7.42 (m, 2H, Ar-H), 7.39 (s, 1H, Ar-H), 7.10 – 7.00 (m, 2H, Ar-H), 3.82 (s, 3H, OCH<sub>3</sub>), 2.79 (s, 3H, CH<sub>3</sub>);  $^{13}C$  NMR (100 MHz, DMSO- $d_6$ )  $\delta$  (ppm): 168.6, 161.5, 159.7, 149.4, 147.0, 145.1, 133.8, 132.4, 131.2, 129.9, 129.0, 127.7, 126.3, 118.8, 114.3, 105.1, 55.7, 18.1; ESI-MS ( $m/z$ ):= 481.0 ( $M + 1$ ); anal. calcd (%) for  $C_{22}H_{17}ClN_6OS_2$ : C, 54.94; H, 3.56; N, 17.47; S, 13.33. Found: C, 54.89; H, 3.58; N, 17.50; S, 13.32.

**1-((6-(4-methoxyphenyl)-2-methylimidazo[2,1-b][1,3,4]thiadiazol-5-yl)methylene)-2-(4-(4-nitro phenyl)thiazol-2-yl)hydrazine (5i):** Yellow solid; m.p. 247-248 °C;  $^1H$  NMR (400 MHz, DMSO- $d_6$ )  $\delta$  (ppm): 12.22 (s, 1H, -NH), 8.41 (s, 1H, -CH), 8.31 – 8.23 (m, 2H, Ar-H), 8.15 – 8.06 (m, 2H, Ar-H), 7.92 – 7.84 (m, 2H, Ar-H), 7.71 (s, 1H, Ar-H), 7.11 – 7.02 (m, 2H, Ar-H), 3.83 (s, 3H, OCH<sub>3</sub>), 2.80 (s, 3H, CH<sub>3</sub>);  $^{13}C$  NMR (100 MHz, DMSO- $d_6$ )  $\delta$  (ppm): 168.8, 161.6, 159.7, 148.8, 147.1, 146.6, 145.0, 141.0, 131.3, 129.9, 126.7, 126.2, 124.5, 118.7, 114.3, 109.2, 55.7, 18.1; ESI-MS ( $m/z$ ):= 492.2 ( $M + 1$ ); anal. calcd (%) for  $C_{22}H_{17}N_7O_3S_2$ : C, 53.76; H, 3.49; N, 19.95; S, 13.05. Found: C, 53.80; H, 3.48; N, 19.80; S, 13.12.

**1-(4-(4-fluorophenyl)thiazol-2-yl)-2-((6-(4-methoxyphenyl)-2-methylimidazo[2,1-b][1,3,4]thiadiazol-5-yl)methylene)hydrazine (5j):** Green solid; m.p. 239-240 °C;  $^1H$  NMR (400 MHz, DMSO- $d_6$ )  $\delta$  (ppm): 12.12 (s, 1H, -NH), 8.41 (s, 1H, -CH), 7.84 – 7.70 (m, 4H, Ar-H), 7.40 – 7.32 (m, 2H, Ar-H), 7.38 (s, 1H, Ar-H), 7.10 – 7.00 (m, 2H, Ar-H), 3.78 (s, 3H, OCH<sub>3</sub>), 2.79 (s, 3H, CH<sub>3</sub>);  $^{13}C$  NMR (100 MHz, DMSO- $d_6$ )  $\delta$  (ppm): 168.6, 162.5, 159.7, 149.4, 147.0, 146.1, 133.8, 132.4, 130.2, 127.9, 129.0, 127.7, 126.3, 118.8, 115.3, 105.1, 55.6, 18.1; ESI-MS ( $m/z$ ):=465.2 ( $M + 1$ ); anal. calcd (%) for  $C_{22}H_{17}FN_6OS_2$ : C, 56.88; H, 3.69; N, 18.09; S, 13.81. Found: C, 56.82; H, 3.68; N, 18.10; S, 13.91.

**1-((6-(4-chlorophenyl)-2-methylimidazo[2,1-b][1,3,4]thiadiazol-5-yl)methylene)-2-(4-*p*-tolylthiazol-2-yl)hydrazine (5k):** Yellow solid; m.p. 249-250 °C;  $^1H$  NMR (400 MHz, DMSO- $d_6$ )  $\delta$  (ppm): 12.18 (s, 1H, -NH), 8.41 (s, 1H, -CH), 8.21 – 8.18 (m, 2H, Ar-H), 8.15 – 8.06 (m, 2H, Ar-H), 7.82 – 7.74 (m, 2H, Ar-H), 7.71 (s, 1H, Ar-H), 7.11 – 7.02 (m, 2H, Ar-

H), 2.82 (s, 3H, CH<sub>3</sub>), 2.38 (s, 3H, CH<sub>3</sub>); <sup>13</sup>C NMR (100 MHz, DMSO-*d*<sub>6</sub>)  $\delta$  (ppm): 168.8, 162.6, 159.7, 148.8, 147.1, 146.6, 145.0, 141.0, 131.3, 129.9, 126.8, 126.2, 125.1, 118.7, 114.3, 109.2, 21.3, 18.1; ESI-MS (*m/z*):= 465.3 (*M* + 1); anal. calcd (%) for C<sub>22</sub>H<sub>17</sub>ClN<sub>6</sub>S<sub>2</sub>: C, 56.83; H, 3.68; N, 18.07; S, 13.79. Found: C, 56.81; H, 3.62; N, 18.12; S, 13.71.

**1-((6-(4-chlorophenyl)-2-methylimidazo[2,1-*b*][1,3,4]thiadiazol-5-yl)methylene)-2-(4-(4-methoxyphenyl)thiazol-2-yl)hydrazine (5l):** Light yellow solid; m.p. 201-202 °C; <sup>1</sup>H NMR (400 MHz, DMSO-*d*<sub>6</sub>)  $\delta$  (ppm): 12.22 (s, 1H, -NH), 8.41 (s, 1H, -CH), 8.31 – 8.23 (m, 2H, Ar-H), 8.10 – 8.06 (m, 2H, Ar-H), 7.82 – 7.74 (m, 2H, Ar-H), 7.71 (s, 1H, Ar-H), 7.11 – 7.02 (m, 2H, Ar-H), 3.83 (s, 3H, OCH<sub>3</sub>), 2.80 (s, 3H, CH<sub>3</sub>); <sup>13</sup>C NMR (100 MHz, DMSO-*d*<sub>6</sub>)  $\delta$  (ppm): 168.8, 161.6, 159.7, 148.8, 147.1, 146.5, 145.0, 142.0, 131.4, 129.9, 126.79, 126.2, 124.5, 118.7, 114.3, 109.2, 55.7, 18.2; ESI-MS (*m/z*):= 481.2 (*M* + 1); anal. calcd (%) for C<sub>22</sub>H<sub>17</sub>ClN<sub>6</sub>OS<sub>2</sub>: C, 54.94; H, 3.56; N, 17.47; S, 13.33. Found: C, 54.91; H, 3.52; N, 17.42; S, 13.31.

**1-((6-(4-chlorophenyl)-2-methylimidazo[2,1-*b*][1,3,4]thiadiazol-5-yl)methylene)-2-(4-(4-chlorophenyl)thiazol-2-yl)hydrazine (5m):** Orange solid; m.p. 235-236 °C; <sup>1</sup>H NMR (400 MHz, DMSO-*d*<sub>6</sub>)  $\delta$  (ppm): 12.27 (s, 1H, -NH), 8.44 (s, 1H, -CH), 8.08 – 8.01 (m, 2H, Ar-H), 7.91 – 7.83 (m, 2H, Ar-H), 7.61 – 7.54 (m, 2H, Ar-H), 7.51 – 7.39 (m, 3H, Ar-H), 2.81 (s, 3H, CH<sub>3</sub>); <sup>13</sup>C NMR (100 MHz, DMSO-*d*<sub>6</sub>)  $\delta$  (ppm): 168.4, 162.2, 149.4, 147.0, 143.4, 133.8, 133.0, 132.9, 132.4, 130.8, 130.1, 129.0, 128.8, 127.7, 119.7, 105.2, 18.1; ESI-MS (*m/z*):= 484.80 (*M* + 1); anal. calcd (%) for C<sub>21</sub>H<sub>14</sub>Cl<sub>2</sub>N<sub>6</sub>O<sub>3</sub>S<sub>2</sub>: C, 51.96; H, 2.91; N, 17.31; S, 13.21. Found: C, 51.88; H, 2.94; N, 17.38; S, 13.22.

**1-((6-(4-chlorophenyl)-2-methylimidazo[2,1-*b*][1,3,4]thiadiazol-5-yl)methylene)-2-(4-(4-fluorophenyl)thiazol-2-yl)hydrazine (5n):** Yellow solid; m.p. 246-248 °C; <sup>1</sup>H NMR (400 MHz, DMSO-*d*<sub>6</sub>)  $\delta$  (ppm): 12.29 (s, 1H, -NH), 8.43 (s, 1H, -CH), 7.91 – 7.82 (m, 2H, Ar-H), 7.71 – 7.63 (m, 2H, Ar-H), 7.58 – 7.54 (m, 2H, Ar-H), 7.48 – 7.39 (m, 3H, Ar-H), 2.81 (s, 3H); <sup>13</sup>C NMR (100 MHz, DMSO-*d*<sub>6</sub>)  $\delta$  (ppm): 168.3, 160.8, 148.4, 146.6, 145.2, 139.3, 133.7, 132.3, 131.5, 131.4, 129.0, 128.8, 127.7, 122.7, 122.1, 119.7, 105.3, 18.1; ESI-MS (*m/z*):= 469.2 (*M* + 1); anal. calcd (%) for C<sub>21</sub>H<sub>14</sub>ClFN<sub>6</sub>S<sub>2</sub>: C, 53.78; H, 3.01; N, 17.92; S, 13.68. Found: C, 53.71; H, 3.05; N, 17.98; S, 13.62.

**1-((6-(4-methoxyphenyl)-2-(trifluoromethyl)imidazo[2,1-*b*][1,3,4]thiadiazol-5-yl)methylene)-2-(4-*p*-tolylthiazol-2-yl)hydrazine (5o):** Light yellow solid; m.p. 238-239 °C; <sup>1</sup>H NMR (400 MHz, DMSO-*d*<sub>6</sub>)  $\delta$  (ppm): 12.25 (s, 1H, -NH), 8.43 (s, 1H, -CH), 7.86 (d, *J* = 8.4 Hz,

2H, Ar-H), 7.781 (d,  $J$  = 8.8 Hz, 2H, Ar-H), 7.197 (s, 1H, Ar-H), 7.11-7.10 (m, 2H, Ar-H), 6.98 (d,  $J$  = 9.2 Hz, 2H, Ar-H), 3.84 (s, 3H, OCH<sub>3</sub>), 2.38 (s, 3H, CH<sub>3</sub>); <sup>13</sup>C NMR (100 MHz, DMSO-*d*<sub>6</sub>)  $\delta$  (ppm): 168.3, 160.1, 159.3, 149.9, 147.1, 146.7, 143.2, 130.4, 130.0, 127.4, 127.3, 125.8, 123.5, 119.7, 114.6, 114.4, 102.5, 55.7, 21.4; ESI-MS ( $m/z$ ):= 515.2 (M + 1); anal. calcd (%) for C<sub>23</sub>H<sub>17</sub>F<sub>3</sub>N<sub>6</sub>OS<sub>2</sub>: C, 53.69; H, 3.33; N, 16.33; S, 12.46. Found: C, 53.61; H, 3.29; N, 16.38; S, 12.42.

**1-((6-(4-methoxyphenyl)-2-(trifluoromethyl)imidazo[2,1-*b*][1,3,4]thiadiazol-5-yl) methylene)-2-(4-(4-methoxy phenyl) thiazol-2-yl) hydrazine (5p):** Yellow solid; m.p. 232-233 °C; <sup>1</sup>H NMR (400 MHz, DMSO-*d*<sub>6</sub>)  $\delta$  (ppm): 8.42 (s, 1H, -CH), 7.86 (d,  $J$  = 9.2 Hz, 2H, Ar-H), 7.78 (d,  $J$  = 8.8 Hz, 2H, Ar-H), 7.19 (s, 1H, Ar-H), 7.11 (d,  $J$  = 8.8 Hz, 2H, Ar-H), 6.97 (d,  $J$  = 9.2 Hz, 2H, Ar-H), 3.84 (s, 3H, OCH<sub>3</sub>), 3.78 (s, 3H, OCH<sub>3</sub>); <sup>13</sup>C NMR (100 MHz, DMSO-*d*<sub>6</sub>)  $\delta$  (ppm): 168.3, 160.1, 159.3, 149.9, 147.2, 146.7, 130.4, 130.0, 127.5, 127.4, 125.8, 119.7, 114.6, 114.4, 102.5, 55.7, 55.6; ESI-MS ( $m/z$ ):= 530.90 (M + 1); anal. calcd (%) for C<sub>23</sub>H<sub>17</sub>F<sub>3</sub>N<sub>6</sub>O<sub>2</sub>S<sub>2</sub>: C, 52.07; H, 3.23; N, 15.84; S, 12.09. Found: C, 51.98; H, 3.24; N, 15.78; S, 12.12.

**1-(4-(4-chlorophenyl)thiazol-2-yl)-2-((6-(4-methoxyphenyl)-2-(trifluoromethyl)imidazo[2,1-*b*][1,3,4]thiadiazol-5-yl)methylene)hydrazine (5q):** Light brown solid; m.p. 236-237 °C; <sup>1</sup>H NMR (400 MHz, DMSO-*d*<sub>6</sub>)  $\delta$  (ppm): 12.25 (s, 1H, -NH), 8.43 (s, 1H, -CH), 7.91 – 7.81 (m, 4H, Ar-H), 7.52 – 7.42 (m, 3H, Ar-H), 7.16 – 7.07 (m, 2H, Ar-H), 3.85 (s, 3H, OCH<sub>3</sub>); <sup>13</sup>C NMR (100 MHz, DMSO-*d*<sub>6</sub>)  $\delta$  (ppm): 168.5, 160.1, 149.5, 147.1, 146.7, 133.8, 132.4, 130.2, 130.0, 129.0, 127.7, 125.8, 119.7, 114.6, 105.4, 55.7; ESI-MS ( $m/z$ ):= 534.80 (M + 1); anal. calcd (%) for C<sub>22</sub>H<sub>14</sub>ClF<sub>3</sub>N<sub>6</sub>OS<sub>2</sub>: C, 49.39; H, 2.64; N, 15.71; S, 11.99. Found: C, 49.40; H, 2.66; N, 15.78; S, 11.92.

**1-(4-(4-fluoro phenyl) thiazol-2-yl)-2-((6-(4-methoxy phenyl)-2-(trifluoromethyl) imidazo[2,1-*b*][1,3,4]thiadiazol-5-yl)methylene)hydrazine (5r):** Yellow solid; m.p. 267-268 °C; <sup>1</sup>H NMR (400 MHz, DMSO-*d*<sub>6</sub>)  $\delta$  (ppm): 12.14 (s, 1H, -NH), 8.41 (s, 1H, -CH), 7.84 (m, 2H, Ar-H), 7.61 (d,  $J$  = 8.4 Hz, 2H, Ar-H), 7.52 – 7.42 (m, 2H, Ar-H), 7.35 (s, 1H, Ar-H), 7.26 – 7.18 (m, 2H, Ar-H), 3.80 (s, 3H, OCH<sub>3</sub>); <sup>13</sup>C NMR (100 MHz, DMSO-*d*<sub>6</sub>)  $\delta$  (ppm): 168.4, 159.1, 149.5, 148.1, 146.8, 133.9, 132.4, 130.3, 130.0, 129.1, 126.7, 125.8, 120.1, 114.6, 105.4, 55.7; ESI-MS ( $m/z$ ):= 519.4 (M + 1); anal. calcd (%) for C<sub>22</sub>H<sub>14</sub>F<sub>4</sub>N<sub>6</sub>OS<sub>2</sub>: C, 50.96; H, 2.72; N, 16.21; S, 12.37. Found: C, 50.90; H, 2.78; N, 16.31; S, 12.32.

**1-((6-(4-chlorophenyl)-2-(trifluoromethyl)imidazo[2,1-b][1,3,4]thiadiazol-5-yl)methylene)-2-(4-*p*-tolylthiazol-2-yl)hydrazine (5s):** Yellow solid; m.p. 264-265 °C; <sup>1</sup>H NMR (400 MHz, DMSO-*d*<sub>6</sub>) δ (ppm): 12.29 (s, 1H, -NH), 8.45 (s, 1H, -CH), 7.87-7.81 (m, 2H, Ar-H), 7.76 (d, *J* = 8.8 Hz, 2H, Ar-H), 7.61 (d, *J* = 8.8 Hz, 2H, Ar-H), 7.47 – 7.43 (m, 3H, Ar-H); <sup>13</sup>C NMR (100 MHz, DMSO-*d*<sub>6</sub>) δ (ppm): 168.5, 160.1, 149.5, 147.1, 146.7, 143.2, 133.8, 132.4, 130.2, 130.0, 129.0, 127.7, 123.4, 125.8, 119.7, 114.6, 105.4, 22.3; ESI-MS (*m/z*):= 519.3 (*M* + 1); anal. calcd (%) for C<sub>22</sub>H<sub>14</sub>ClF<sub>3</sub>N<sub>6</sub>S<sub>2</sub>: C, 50.92; H, 2.72; N, 16.19; S, 12.36. Found: C, 50.82; H, 2.68; N, 16.18; S, 12.44.

**1-((6-(4-chlorophenyl)-2-(trifluoromethyl)imidazo[2,1-b][1,3,4]thiadiazol-5-yl) methylene)-2-(4-(4-methoxyphenyl)thiazol-2-yl)hydrazine (5t):** Yellow solid; m.p. 228-229 °C; <sup>1</sup>H NMR (400 MHz, DMSO-*d*<sub>6</sub>) δ (ppm): 12.29 (s, 1H, -NH), 8.45 (s, 1H, -CH), 7.97 (d, *J* = 8.8 Hz, 2H, Ar-H), 7.86 (d, *J* = 8.4 Hz, 2H, Ar-H), 7.61 (d, *J* = 8.4 Hz, 2H, Ar-H), 7.47 – 7.43 (m, 3H, Ar-H), 3.82 (s, 3H, OCH<sub>3</sub>); <sup>13</sup>C NMR (100 MHz, DMSO-*d*<sub>6</sub>) δ (ppm): 168.5, 160.1, 149.5, 147.1, 146.7, 144.2, 133.8, 132.4, 130.2, 130.0, 129.0, 127.7, 125.8, 123.2, 119.7, 114.6, 105.4, 55.7; ESI-MS (*m/z*):= 535.20 (*M* + 1); anal. calcd (%) for C<sub>24</sub>H<sub>14</sub>ClF<sub>3</sub>N<sub>6</sub>OS<sub>2</sub>: C, 49.39; H, 2.64; N, 15.71; S, 11.99. Found: C, 49.42; H, 2.68; N, 15.68; S, 11.94.

**1-((6-(4-chlorophenyl)-2-(trifluoromethyl)imidazo[2,1-b][1,3,4]thiadiazol-5-yl)methylene)-2-(4-(4-chlorophenyl)thiazol-2-yl)hydrazine (5u):** Light Yellow solid; m.p. 240-241 °C; <sup>1</sup>H NMR (400 MHz, DMSO-*d*<sub>6</sub>) δ (ppm): 12.29 (s, 1H, -NH), 8.45 (s, 1H, -CH), 7.97 (d, *J* = 8.4 Hz, 2H, Ar-H), 7.86 (d, *J* = 8.8 Hz, 2H, Ar-H), 7.61 (d, *J* = 8.8 Hz, 2H, Ar-H), 7.47 – 7.43 (m, 3H, Ar-H); <sup>13</sup>C NMR (100 MHz, DMSO-*d*<sub>6</sub>) δ (ppm): 168.3, 160.8, 149.7, 146.6, 145.2, 133.7, 132.3, 131.5, 131.5, 130.2, 129.6, 129.1, 128.0, 127.9, 120.7, 116.0, 115.8, 104.5; ESI-MS (*m/z*):= 539.10 (*M* + 1); anal. calcd (%) for C<sub>21</sub>H<sub>11</sub>Cl<sub>2</sub>F<sub>3</sub>N<sub>6</sub>S<sub>2</sub>: C, 46.76; H, 2.06; N, 15.58; S, 11.89. Found: C, 46.66; H, 2.08; N, 15.68; S, 11.92.

**1-((6-(4-chlorophenyl)-2-(trifluoromethyl)imidazo[2,1-b][1,3,4]thiadiazol-5-yl)methylene)-2-(4-(4-nitro phenyl)thiazol-2-yl)hydrazine (5v):** Yellow solid; m.p. 261-262 °C; <sup>1</sup>H NMR (400 MHz, DMSO-*d*<sub>6</sub>) δ (ppm): 12.30 (s, 1H, -NH), 8.46 (s, 1H, -CH), 7.96 -7.90 (m, 2H, Ar-H, Ar-H), 7.86 (d, *J* = 8.4 Hz, 2H, Ar-H), 7.58 (d, *J* = 8.6 Hz, 2H, Ar-H), 7.45 – 7.41 (m, 2H, Ar-H), 7.35 (s, 1H, Ar-H); <sup>13</sup>C NMR (100 MHz, DMSO-*d*<sub>6</sub>) δ (ppm): 168.4, 160.2, 148.4, 147.2, 146.3, 134.2, 131.4, 130.3, 130.0, 129.0, 128.2, 127.7, 124.3, 120.7, 115.8, 114.6, 105.4; ESI-MS (*m/z*):= 550.20 (*M* + 1); anal. calcd (%) for C<sub>21</sub>H<sub>11</sub>ClF<sub>3</sub>N<sub>7</sub>O<sub>2</sub>S<sub>2</sub>: C, 45.86; H, 2.02; N, 17.83; S, 11.66. Found: C, 45.76; H, 2.04; N, 17.85; S, 11.72.

**1-((6-(4-chlorophenyl)-2-(trifluoromethyl)imidazo[2,1-b][1,3,4]thiadiazol-5-yl)methylene)-2-(4-(4-fluorophenyl)thiazol-2-yl)hydrazine (5w):** Yellow solid; m.p. 263-264 °C; <sup>1</sup>H NMR (400 MHz, DMSO-*d*<sub>6</sub>)  $\delta$  (ppm): 12.24 (s, 1H, -NH), 8.45 (s, 1H), 8.01 – 7.94 (m, 2H), 7.92 – 7.84 (m, 2H), 7.61 (d, *J* = 8.6 Hz, 2H), 7.35 (s, 1H), 7.24 (t, *J* = 8.9 Hz, 2H). <sup>13</sup>C NMR (100 MHz, DMSO-*d*<sub>6</sub>)  $\delta$  (ppm): 168.3, 160.8, 149.7, 146.6, 145.2, 133.7, 132.3, 131.5, 131.5, 130.2, 129.6, 129.1, 128.0, 127.9, 120.7, 116.0, 115.8, 104.5; ESI-MS (*m/z*):= 523.10 (*M* + 1); anal. calcd (%) for C<sub>21</sub>H<sub>11</sub>ClF<sub>4</sub>N<sub>6</sub>S<sub>2</sub>: C, 48.23; H, 2.12; N, 16.07; S, 12.26. Found: C, 48.20; H, 2.13; N, 16.10; S, 12.32.

### Antitubercular studies

Two-fold serial dilutions of each test compound/drug were prepared and incorporated into Middlebrook 7H11 agar medium with oleic acid, albumin, dextrose, and catalase (OADC) growth supplement to get final concentrations of 50, 25, 12.5, 6.25, 3.13, 1.56 and 0.78  $\mu$ g/mL. Inoculum of MTB H37Rv ATCC 27294/XDR-TB was prepared from fresh Middlebrook 7H11 agar slants with OADC (Difco) growth supplement adjusted to 1 mg/mL (wet weight) in Tween 80 (0.05%) saline diluted to 10<sup>-2</sup> to give a concentration of  $\sim$ 10<sup>7</sup> cfu/mL. Five microliters of this bacterial suspension was spotted onto 7H11 agar tubes containing different concentrations of the drug as discussed above. The tubes were incubated at 37 °C, and final readings (as MIC in mg/mL) were determined after 28 days. This method is similar to that recommended by the National Committee for Clinical Laboratory Standards for the determination of MIC in triplicate.

### Anti-bacterial studies

Minimum concentration of compounds required for the inhibition of bacteria *S. aureus* (ATTC 25923), *P. aeruginosa* (ATCC 27853) and *E. coli* (ATTC 25922) was determined using compound concentration ranging from 3.125–50  $\mu$ g/mL. Test compounds are dissolved in DMSO and serially diluted to 50, 25, 12.5, 6.25, 3.125  $\mu$ g/mL of concentration. In a 96 well plate 50  $\mu$ L of bacterial was taken and 50  $\mu$ L of serially diluted above compounds were added to each well and mixed. Incubated the mixture for 12 h and observed each well for the bacterial growth. The lowest concentration at which no microbial growth found was taken as MIC. For the conformation, 10  $\mu$ L of the mixture from each well was spread on a nutrient agar plate and incubated to check for any bacterial growth. Ciprofloxacin was used as standard for bacteria screening.

## Cytotoxicity studies

The NIH 3T3 mouse embryonic fibroblasts cell line was procured from National Centre for Cell Sciences (NCCS), Pune, India. The cell lines were maintained in 96 wells micro titer plate containing MEM media supplemented with 10% heat inactivated fetal calf serum (FCS), containing 5% of mixture of Gentamicin (10 $\mu$ g), Penicillin (100 Units/ml) and Streptomycin (100 $\mu$ g/ml) in presence of 5% CO<sub>2</sub> at 37°C for 48-72 hours. For cytotoxicity studies, each weighed test drugs were separately dissolved in distilled DMSO to obtain a stock solution of 1 mg/ml concentration and sterilized by filtration. Serial two fold dilutions were prepared from this for carrying out MTT assay. The cells were then exposed to different concentrations of drug and kept for incubation for 48 h. The control group contains only DMSO. After the incubation, stock solution of MTT (3-[4,5-dimethylthiazol-2-yl]-2,5-diphenyl tetrazolium bromide) (20  $\mu$ L, 5mg/mL in sterile PBS) was added to each well and cells were incubated for additional 2 - 3 h at 5% CO<sub>2</sub> atmosphere. After careful removal of incubation medium from the incubator, 100  $\mu$ L of DMSO was added and the plates were gently shaken to re-suspend formed formazan and waited for few minutes to form a homogenized color. The suspension was placed on a micro vibrator for 5 minute, and absorbances of wells containing cells and blanks were recorded at 490 nm. The experiment was executed in triplicate. The mean of the absorbance of wells was calculated with the same treatment after subtracting of blank absorbance. The results were normalized by considering control wells as 100% (maximum absorbance obtained), expressing then the results as percentage of controls. Percentage of growth inhibition was calculated from below equation.

$$\% \text{ Growth Inhibition} = 100 - \left[ \frac{\text{Mean OD of individual test group}}{\text{Mean OD of control group}} \times 100 \right]$$

## Molecular docking studies

The crystal structure of InhA (PDB code: 1P44) and CYP121 (PDB code: 4KTF) from species of *Mycobacterium tuberculosis* for docking explorations were taken from Protein Data Bank. The protein was initially subjected to various processes such as removal of water molecules and removal of heteroatoms etc., using the Protein Preparation Wizard of Schrödinger 2015.<sup>1</sup> The molecules were sketched using Maestro panel of Schrodinger<sup>2</sup> and were subjected for all possible conformation generation using LigPrep module.<sup>1</sup> These molecules were docked to the active site of protein using extra precision (XP) mode of Glide.<sup>3</sup>

**Table S3.** Docking score of the active compounds and list of interacting amino acid residues.

| <b>Compound ID</b> | <b>1P44</b>                     |                                        | <b>4KTF</b>                     |                                        |
|--------------------|---------------------------------|----------------------------------------|---------------------------------|----------------------------------------|
|                    | <b>Docking score (Kcal/mol)</b> | <b>Interacting amino acid residues</b> | <b>Docking score (kcal/mol)</b> | <b>Interacting amino acid residues</b> |
| <b>5d</b>          | -8.89                           | Phe 149, Tyr 158, Ala 157, Gly 104     | -7.38                           | Phe 230, Trp 182, Asp 182              |
| <b>5e</b>          | -7.98                           | Glu 219, Tyr 158                       | -8.11                           | Phe 230, Trp 182                       |
| <b>5h</b>          | -7.9                            | Ala 157, Gly 104, Phe 149, Tyr 158     | -8.34                           | Val 82, Gln 385                        |
| <b>5i</b>          | -8.11                           | Ala 157, Gly 104, Phe 149, Tyr 158     | -8.11                           | Trp 182                                |
| <b>5o</b>          | -6.71                           | Phe 149                                | -8.53                           | Ala 167, Trp 182                       |
| <b>5r</b>          | -8.44                           | Phe 149                                | -8.62                           | Ala 167, Trp 182                       |
| <b>5s</b>          | -7.23                           | Phe 149, Tyr 158                       | -8.27                           | Phe 168, Trp182, Ala 167               |
| <b>5t</b>          | -7.43                           | Phe 149                                | -6.46                           | Phe 168, Trp 182, Thr 77, Gln 385      |
| <b>5w</b>          | -6.28                           | -                                      | -9.75                           | Trp 182                                |

## References

1. Schrödinger Suite 2015-1 Protein Preparation Wizard; Epik version 3.1, Schrödinger, LLC, New York, NY, 2015; Impact version 6.6, Schrödinger, LLC, New York, NY, 2015; Prime version 3.9, Schrödinger, LLC, New York, NY, 2015.
2. Maestro, version 10.1, Schrödinger, LLC, New York, NY, 2015.
3. Glide, version 6.6, Schrödinger, LLC, New York, NY, 2015.

The  $^1\text{H}$  NMR,  $^{13}\text{C}$  NMR and mass spectra of selected compounds are given below.

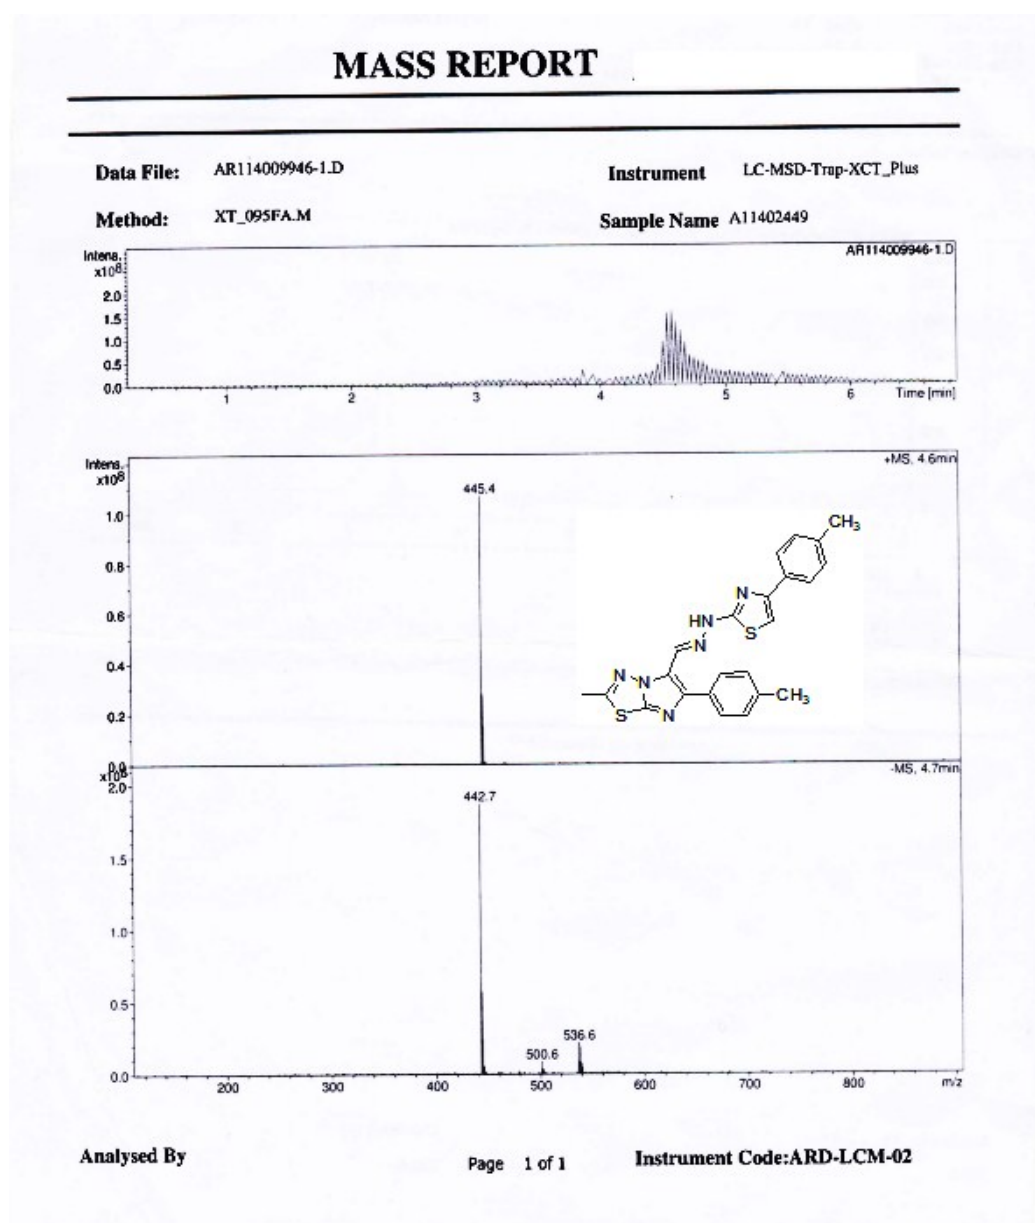

Figure S1. MS spectrum of 5a

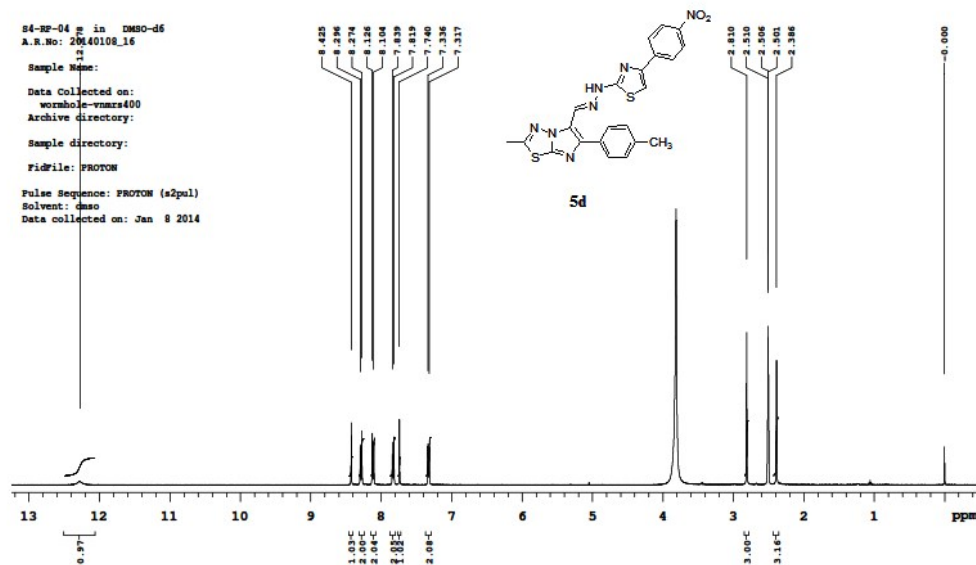

Figure S2.  $^1\text{H}$  NMR spectrum of **5d**

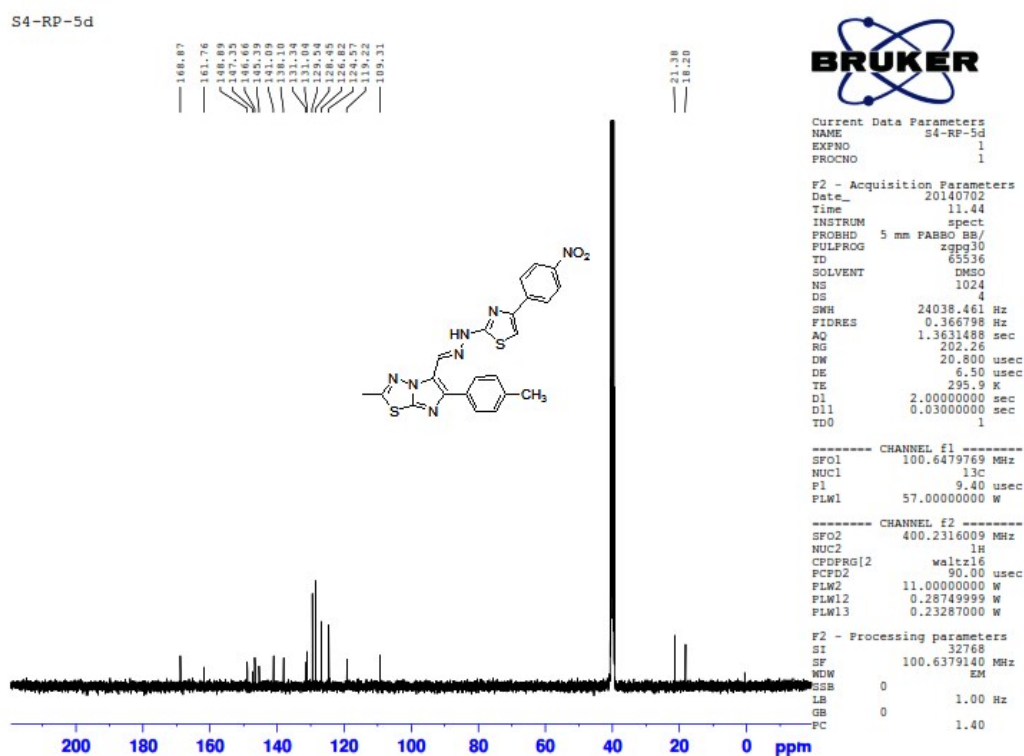

Figure S3.  $^{13}\text{C}$  NMR spectrum of **5d**

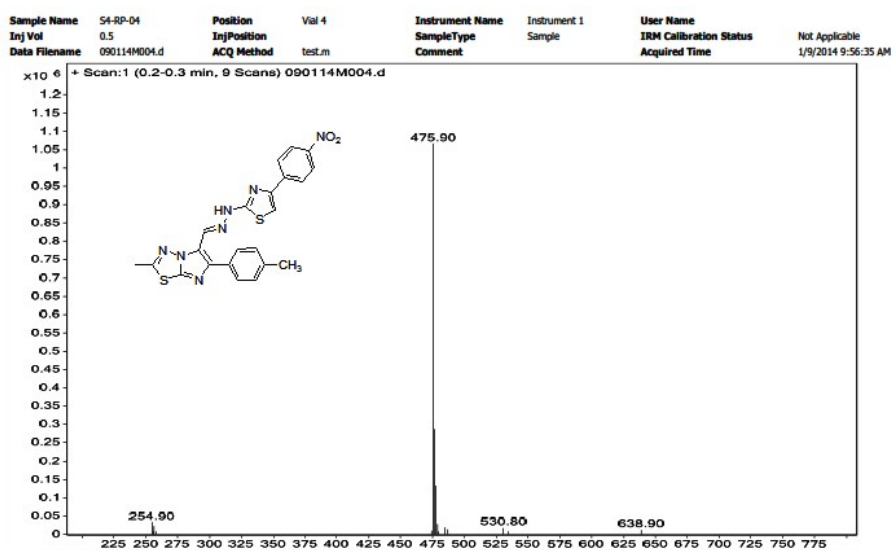

Figure S4. MS spectrum of **5d**

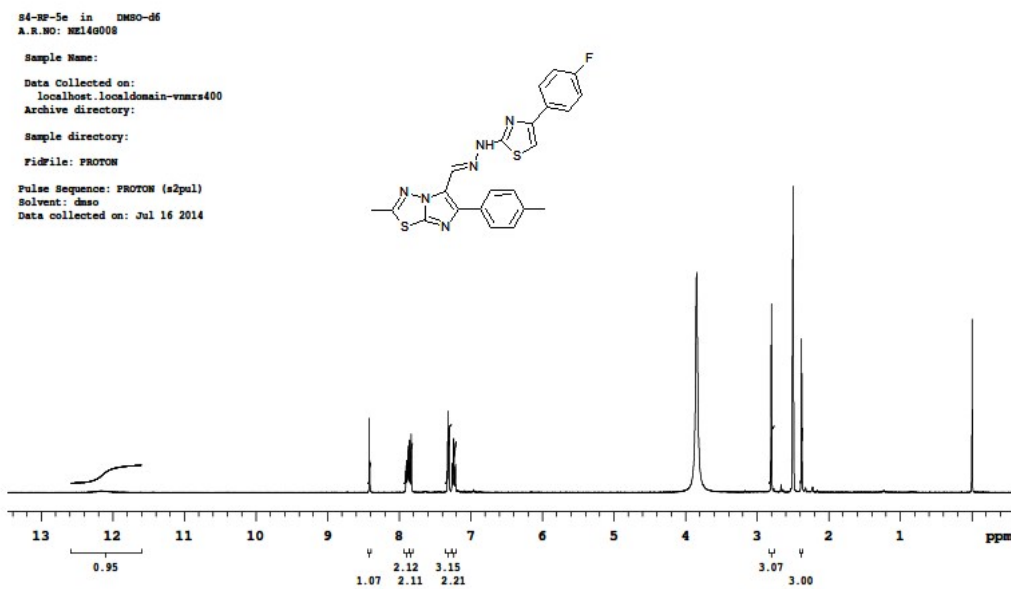

Figure S5. <sup>1</sup>H NMR spectrum of **5e**

S4-RP-5e

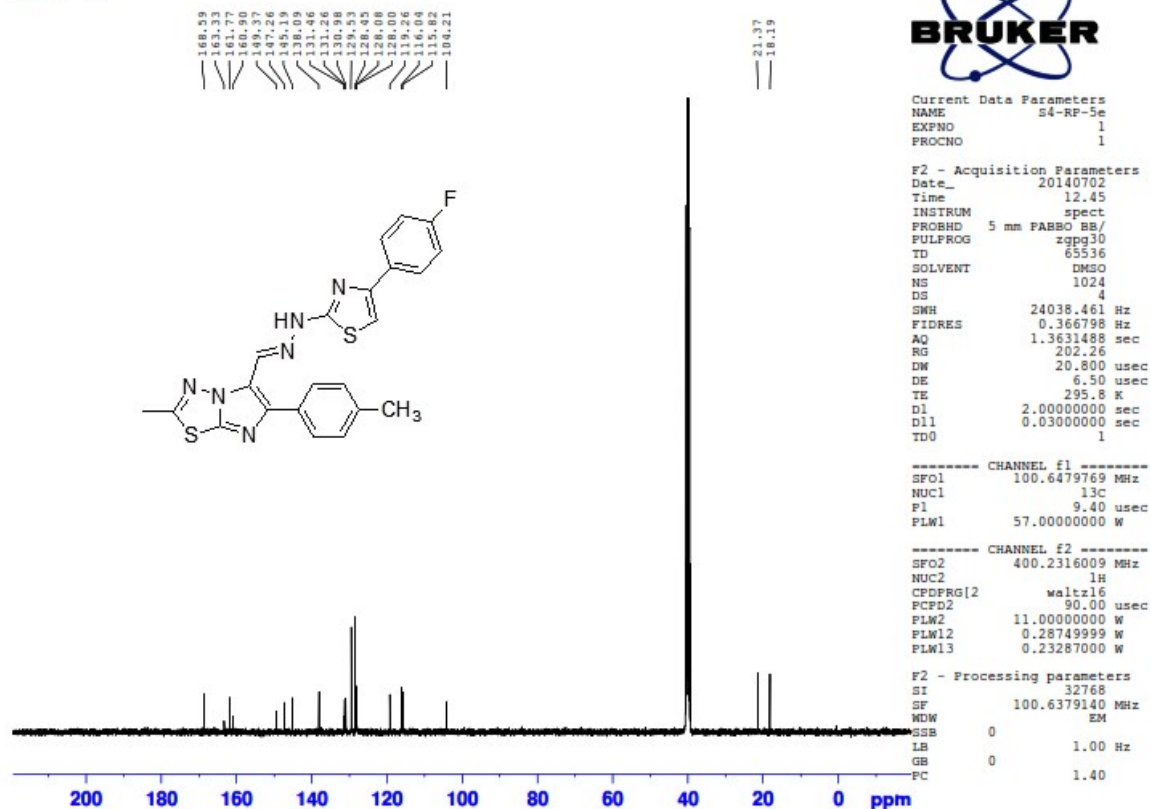

Figure S6.  $^{13}\text{C}$  NMR spectrum of 5e

# MASS REPORT

Data File: AR114009946-2.D

Instrument LC-MSD-Trip-XCT\_Plus

Method: XT\_095FA.M

Sample Name A11402449

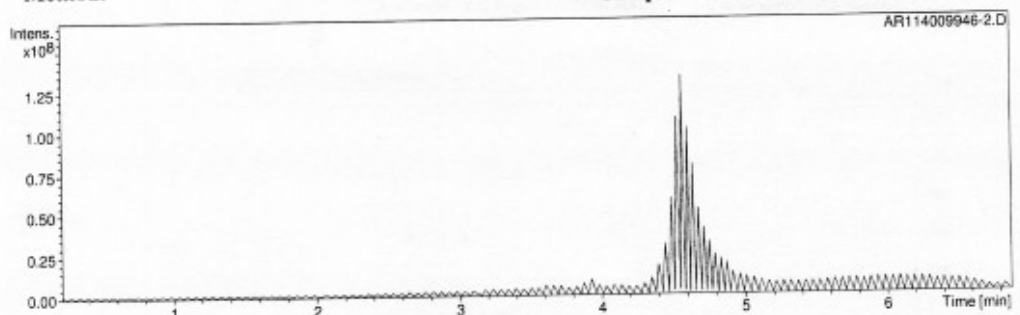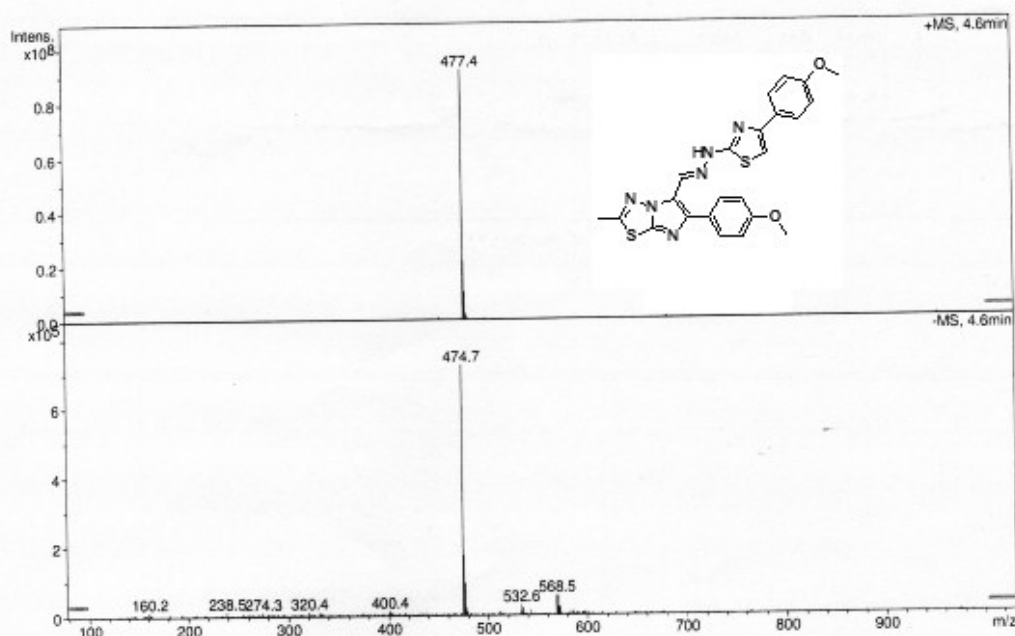

Analysed By

Page 1 of 1

Instrument Code:ARD-LCM-02

Figure S7. MS spectrum of 5g

S4-RP-5h in DMSO-d6  
A.R.NO: N2140009

Sample Name:

Data Collected on:

localhost.localdomain-vmrs400

Archive directory:

Sample directory:

Fidfile: PROTON

Pulse Sequence: PROTON (s2pul)

Solvent: dms

Data collected on: Jul 16 2014

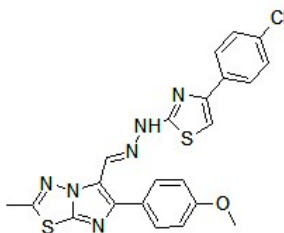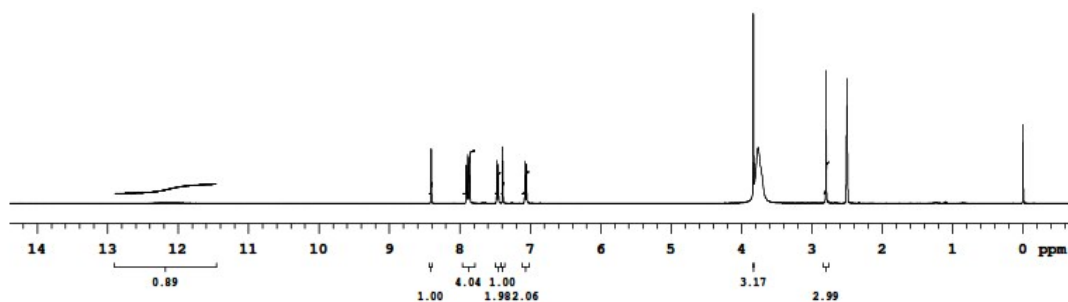

Figure S8.  $^1\text{H}$  NMR spectrum of **5h**

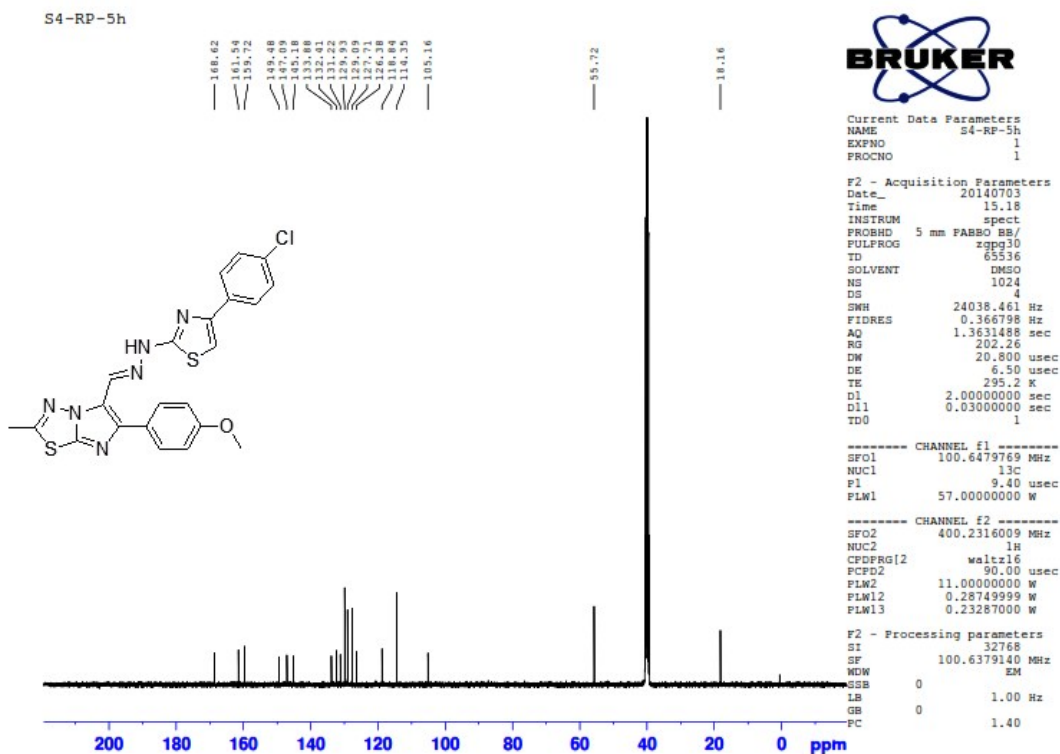

Figure S9.  $^{13}\text{C}$  NMR spectrum of **5h**

S4-RF-5i in DMSO-d6  
A.R.NO: NE140010  
Sample Name:  
Data Collected on:  
localhost.localdomain-vmrs400  
Archive directory:  
Sample directory:  
Fidfile: PROTON  
Pulse Sequence: PROTON (s2pul)  
Solvent: dms  
Data collected on: Jul 16 2014

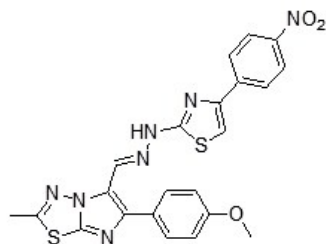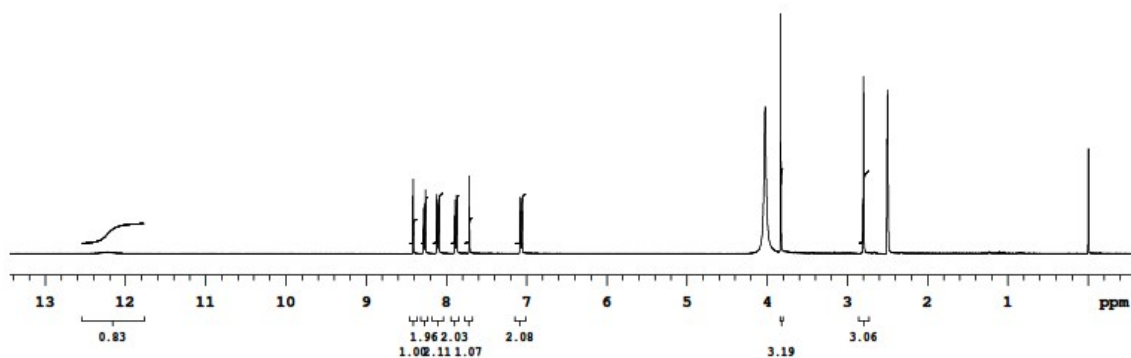

Figure S10.  $^1\text{H}$  NMR spectrum of **5i**

S4-RP-5i

166.67  
161.63  
155.77  
148.13  
146.63  
145.09  
131.36  
129.95  
128.21  
126.21  
124.25  
118.77  
111.77  
109.28

55.73

18.16

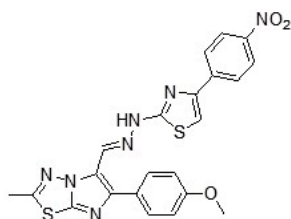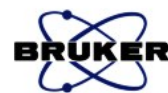

Current Data Parameters  
NAME S4-RF-5i  
EXPNO 1  
PROCNO 1

F2 - Acquisition Parameters  
Date\_ 20140702  
Time 13.48  
INSTRUM spect  
PROBHD 5 mm F400 BB/  
PULPROG zgpg30  
TD 65536  
SOLVENT DMSO  
NS 1024  
DS 4  
SWH 24038.461 Hz  
FIDRES 0.366798 Hz  
AQ 1.3631488 sec  
RG 202.26  
DW 20.800 usec  
DE 6.50 usec  
TE 295.9 K  
D1 2.0000000 sec  
D11 0.0300000 sec  
TD0 1

----- CHANNEL f1 -----  
SFO1 100.6479769 MHz  
NUC1 13C  
P1 9.40 usec  
PLM1 57.00000000 W

----- CHANNEL f2 -----  
SFO2 400.2316009 MHz  
NUC2 1H  
PCPDPRG2 waltz16  
PCPD2 90.00 usec  
PLM2 11.00000000 W  
PLM12 0.28749999 W  
PLM13 0.23287000 W

F2 - Processing parameters  
SI 32768  
SF 100.6379140 MHz  
WDW EM  
SSB 0  
LB 1.00 Hz  
GB 0  
PC 1.40

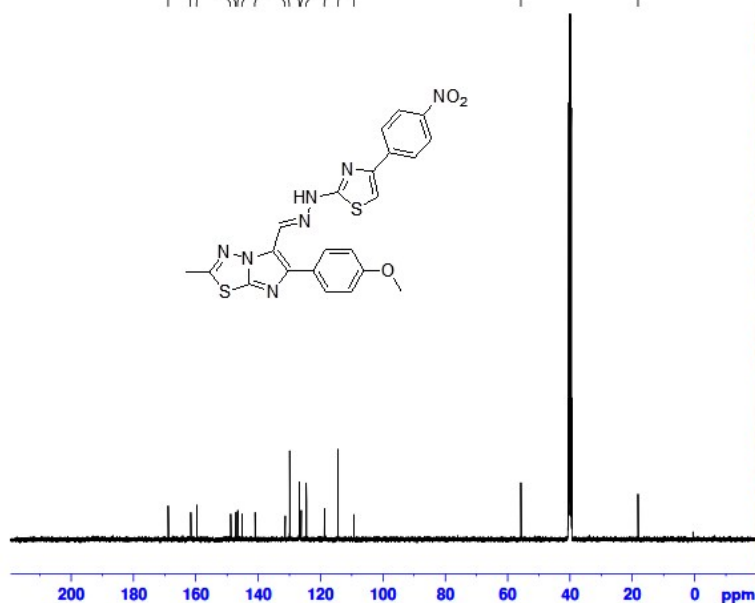

Figure S11.  $^{13}\text{C}$  NMR spectrum of **5i**

# MASS REPORT

Data File: FRACTION-S.D

Instrument LC-MSD-Trap-XCT\_Plus

Method: XT\_095FA.M

Sample Name PREP

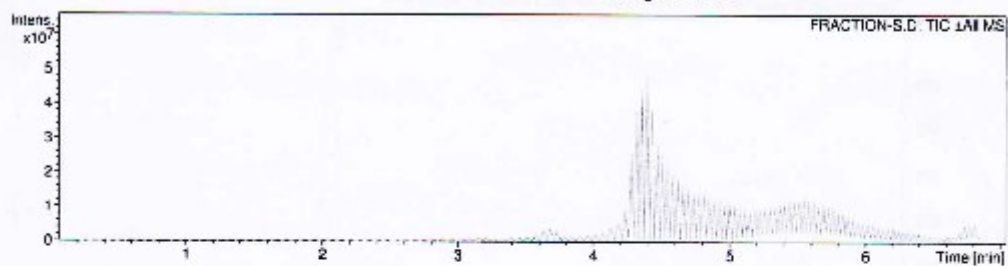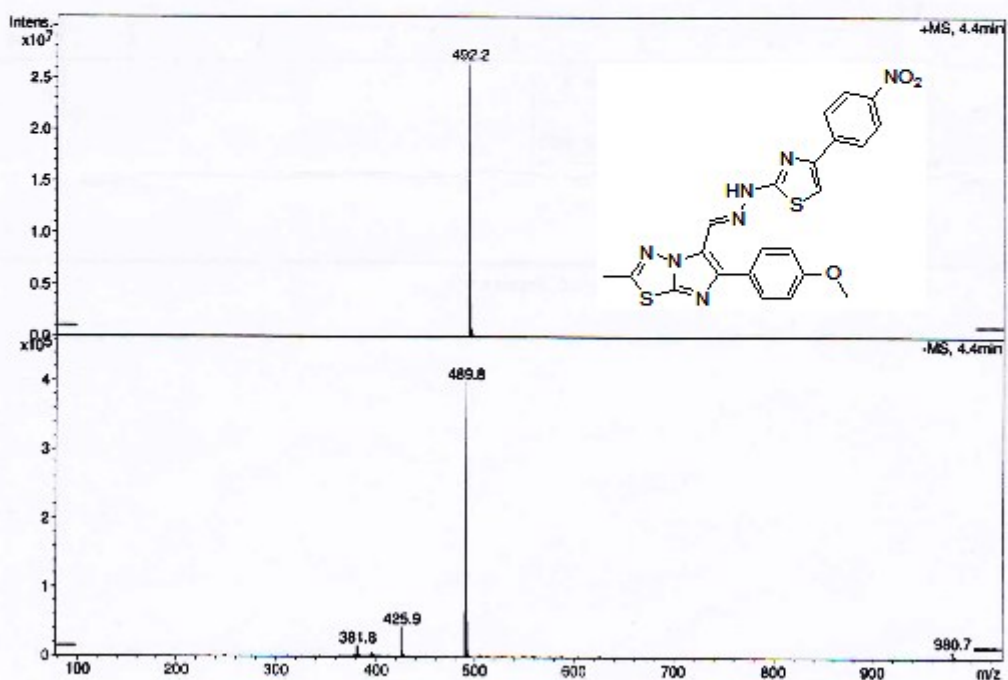

Analysed By

Page 1 of 1

Instrument Code:ARD-LCM-02

Figure S12. MS spectrum of 5i

# MASS REPORT

Data File: AR114009658-1.D

Instrument LC-MSD-Trip-XCT\_Plus

Method: XT\_095FA.M

Sample Name A11402543

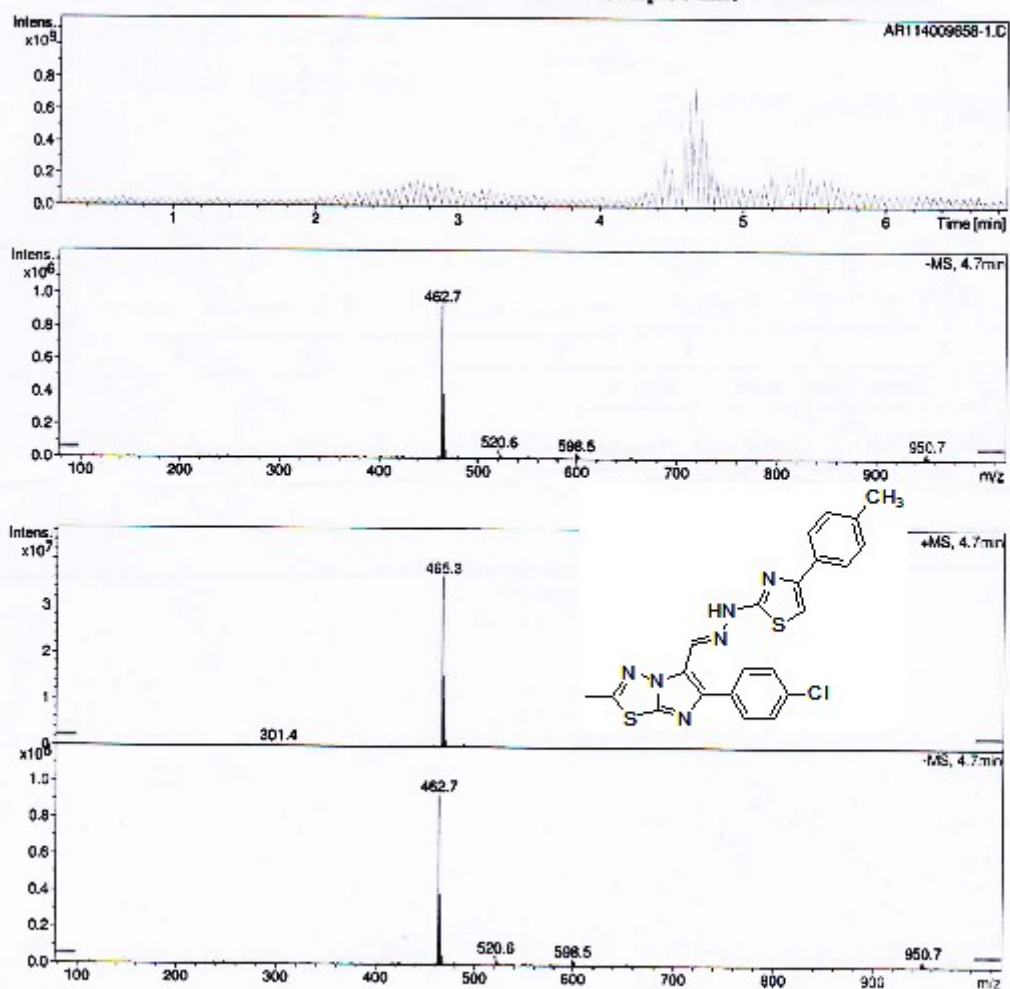

Analysed By

Page 1 of 1

Instrument Code:ARD-LCM-02

Figure S13. MS spectrum of 5k

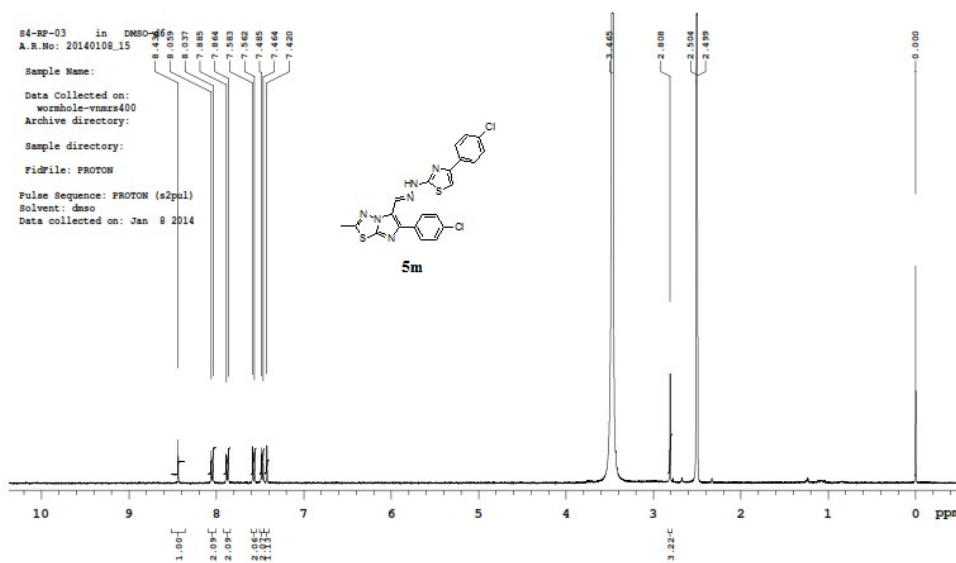

Figure S14.  $^1\text{H}$  NMR spectrum of **5m**

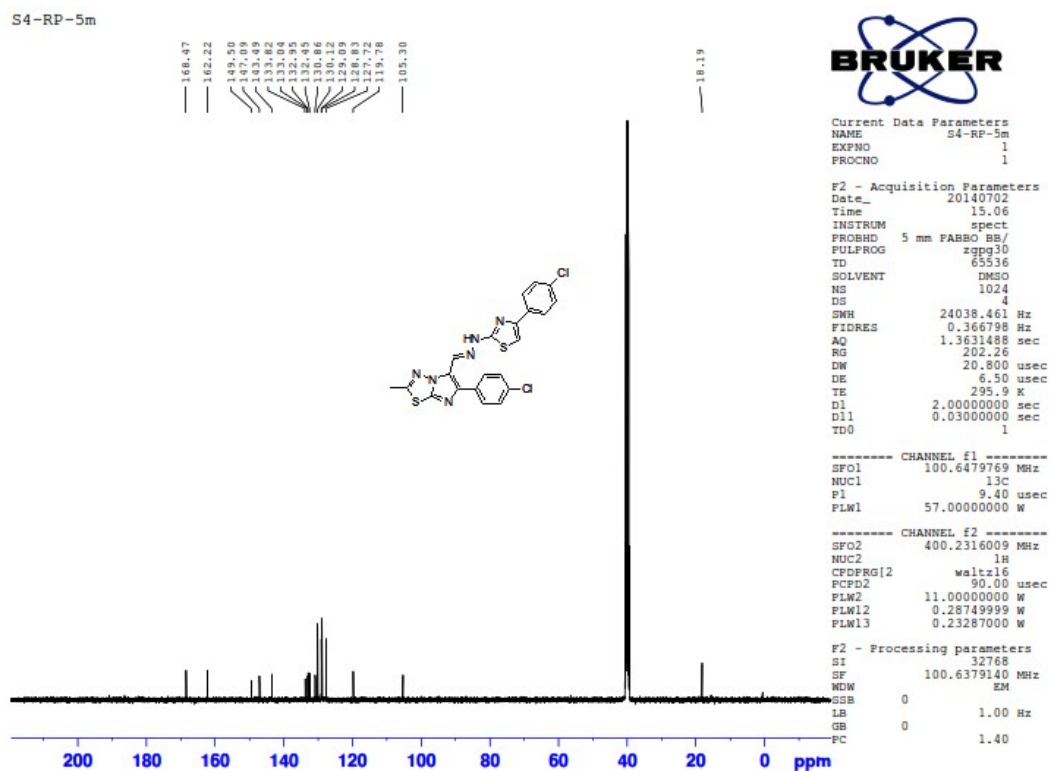

Figure S15.  $^{13}\text{C}$  NMR spectrum of **5m**

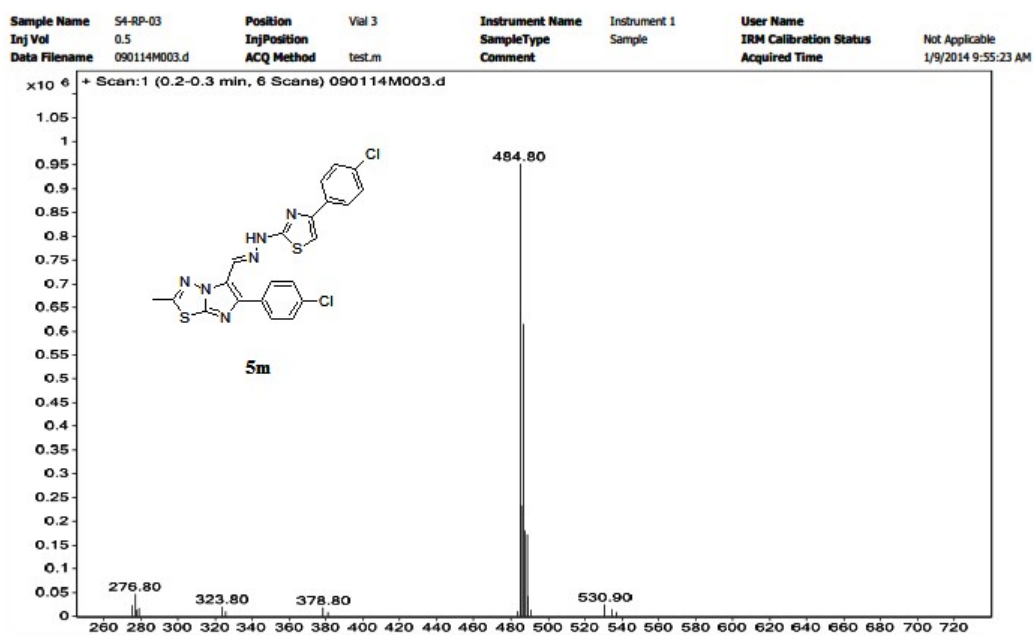

Figure S16. MS spectrum of **5m**

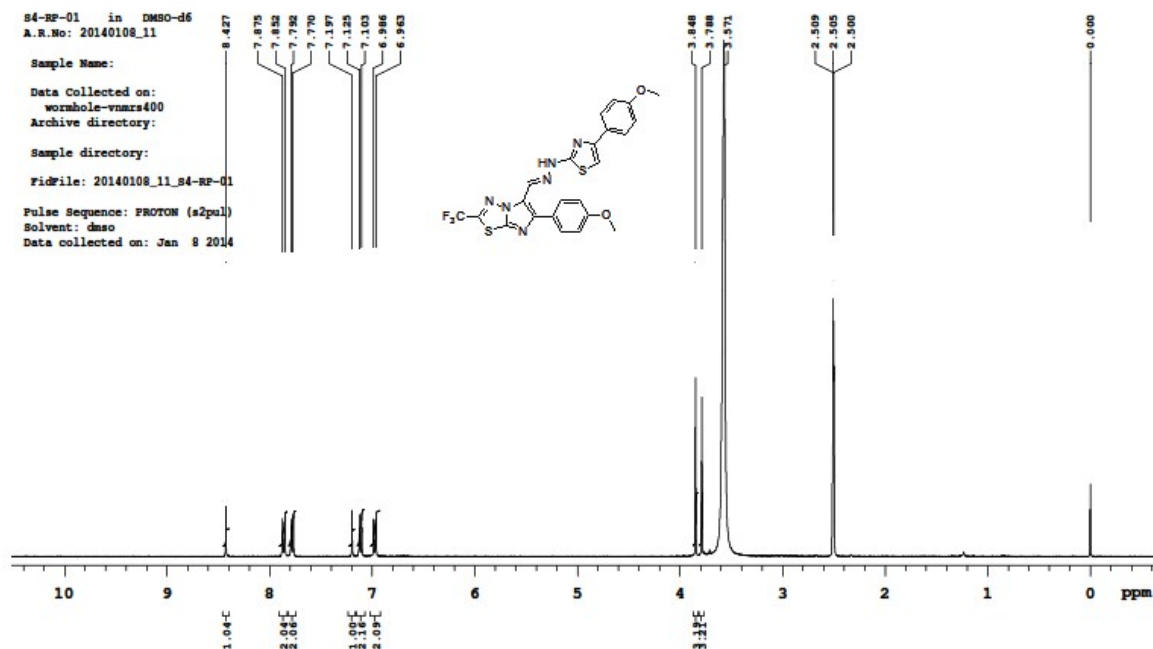

Figure S17.  $^1\text{H}$  NMR spectrum of **5p**

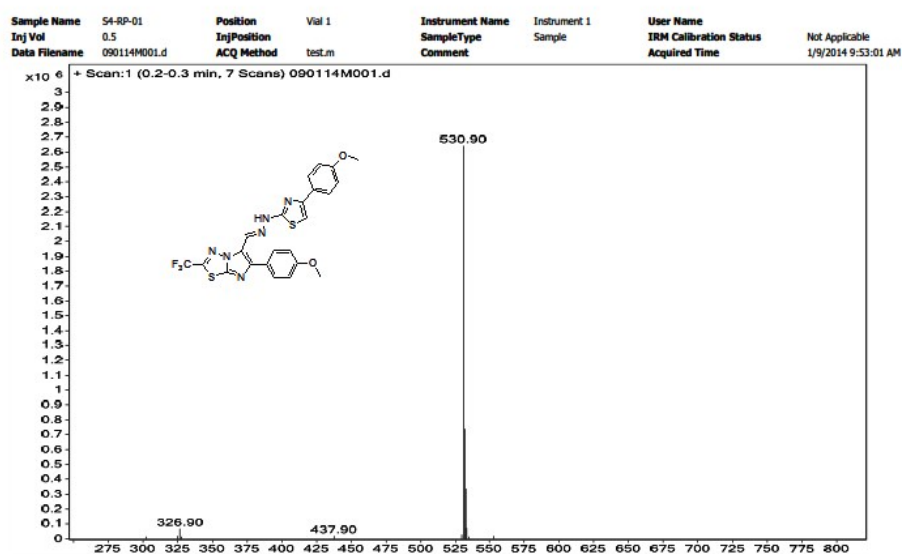

Figure S18.  $^{13}\text{C}$  NMR spectrum of 5p

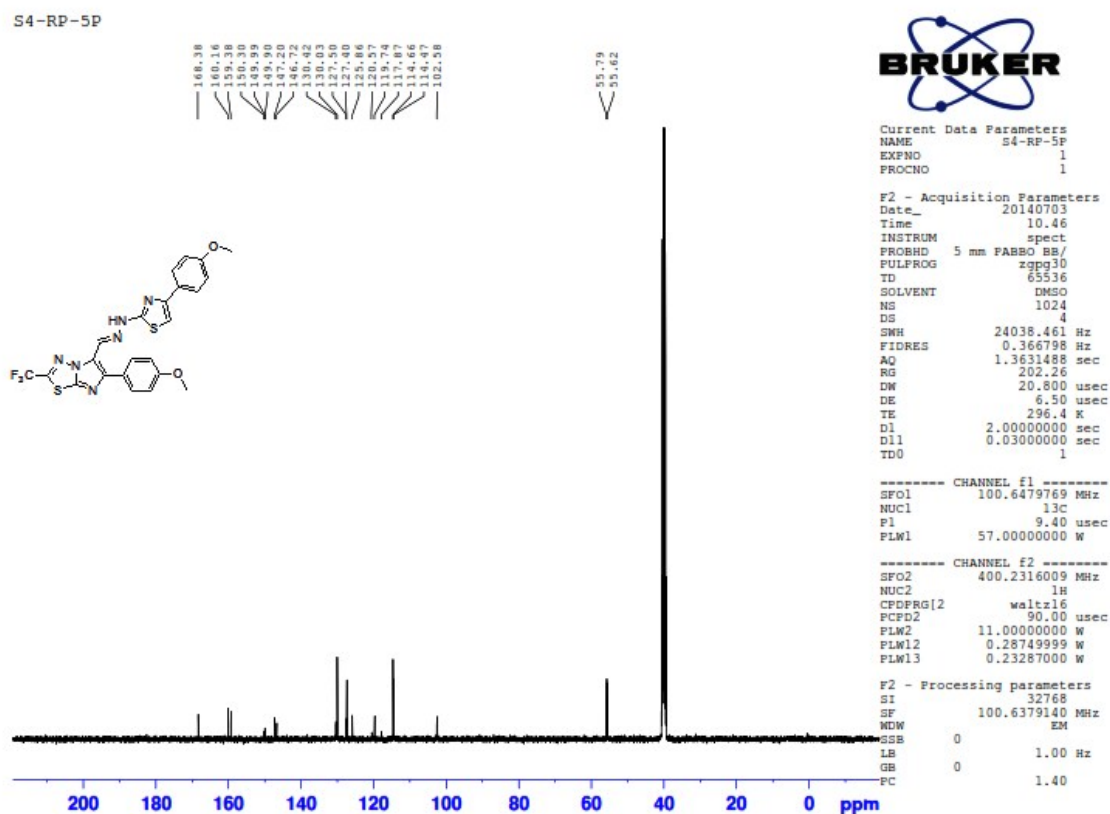

Figure S19.  $^{13}\text{C}$  NMR spectrum of 5p



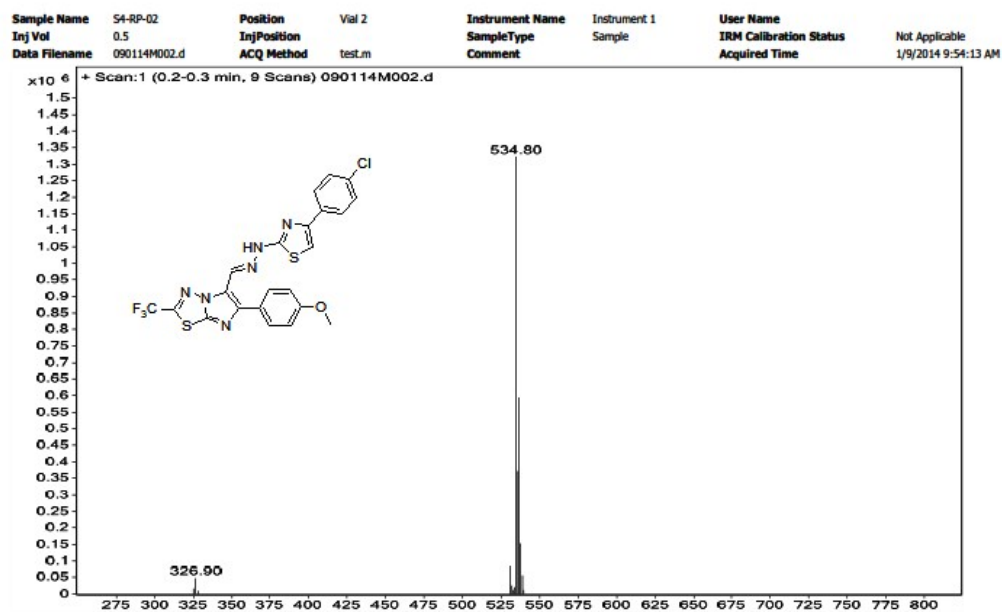

Figure S22. MS spectrum of 5q

# MASS REPORT

Data File: AR114009658-2.D

Instrument LC-MSD-Trap-XCT\_Plus

Method: XT\_095FA.M

Sample Name A11402543

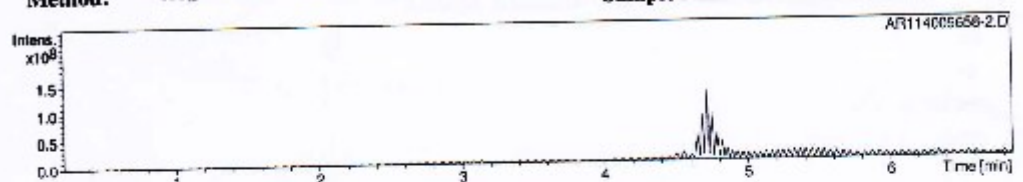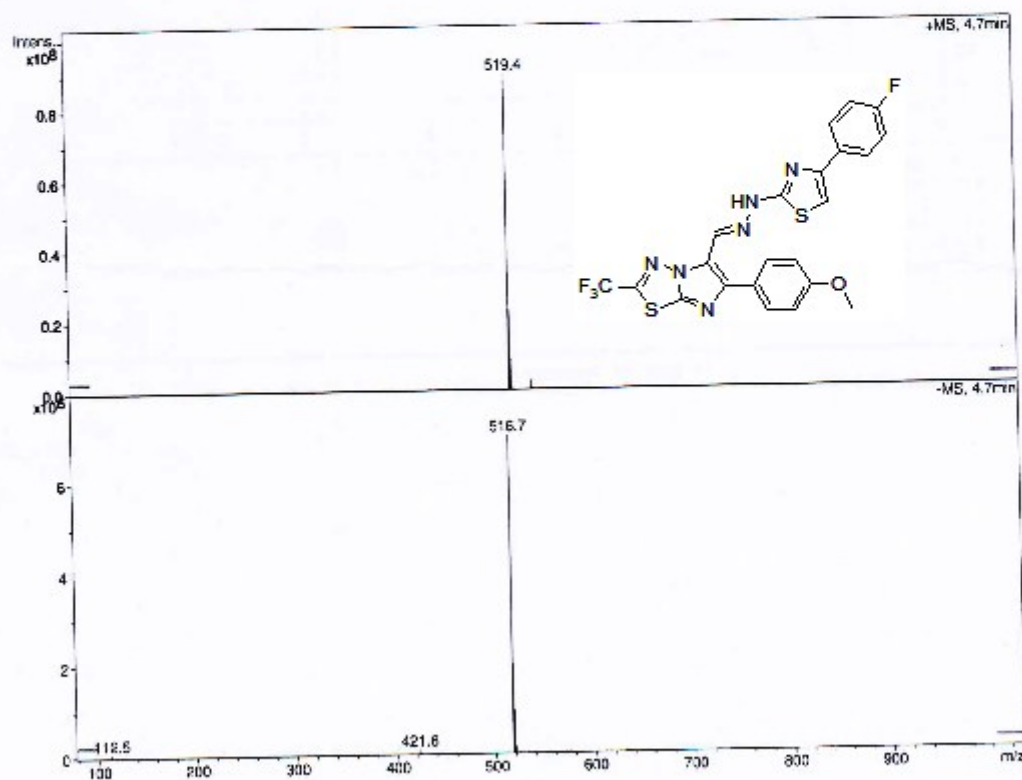

Analysed By

Page 1 of 1

Instrument Code:ARD-LCM-02

Figure S23. MS spectrum of 5r

## MASS REPORT

Data File: AR114009658-3.D

Instrument LC-MSD-Trap-XCT\_Plus

Method: XT\_095FA.M

Sample Name A11402543

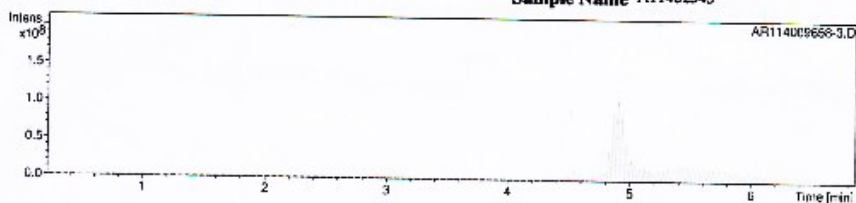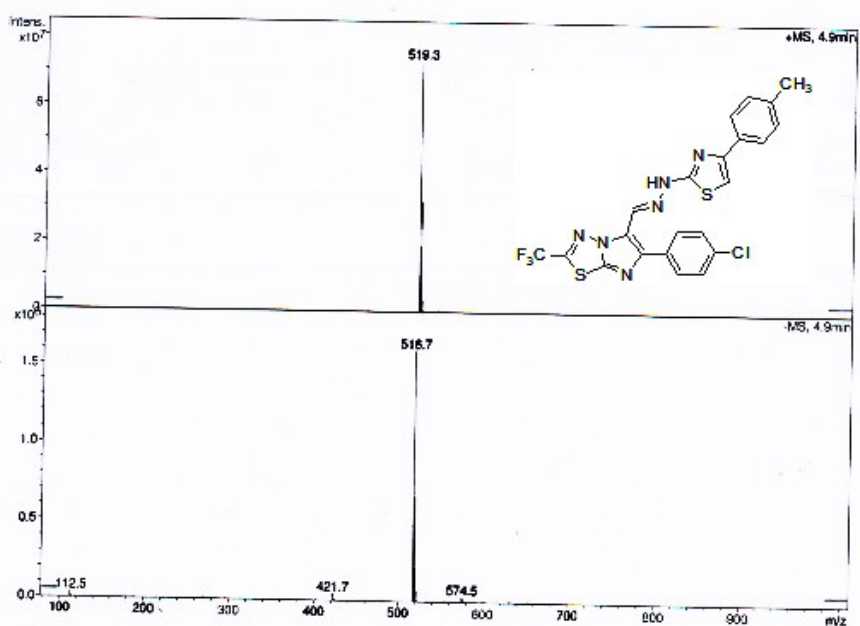

Analysed By

Page 1 of 1

Instrument Code:ARD-LCM-02

Figure S24. MS spectrum of 5s

# MASS REPORT

Data File: FRACTION-01.D

Instrument LC-MSD-Trap-XCT\_Plus

Method: XT\_095FA.M

Sample Name PREP

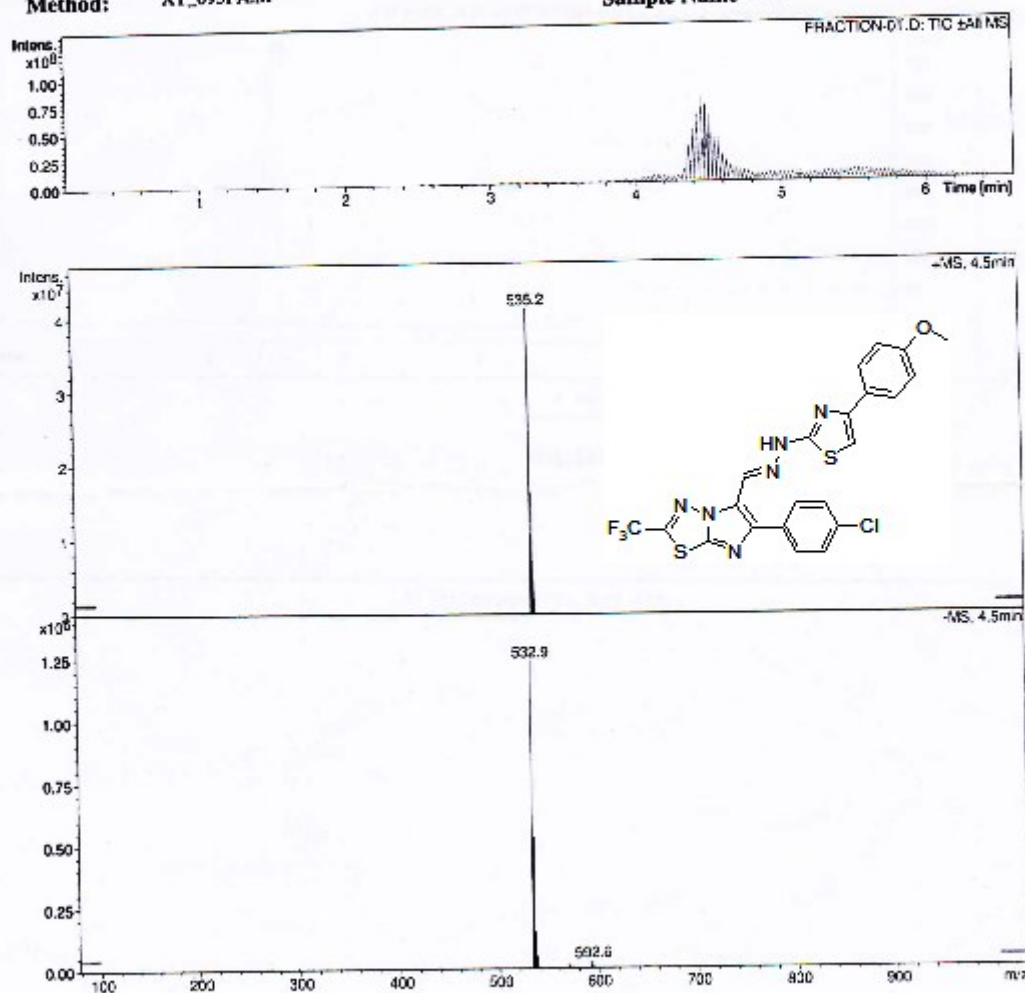

Analysed By

Page 1 of 1

Instrument Code:ARD-LCM-02

Figure S25. MS spectrum of 5t

S4-RF-5u in DMSO-d6  
 A.R.NO: NE14G011  
 Sample Name:  
 Data Collected on:  
 localhost.localdomain-vnmrs400  
 Archive directory:  
 Sample directory:  
 FidFile: PROTON  
 Pulse Sequence: PROTON (s2pul)  
 Solvent: dms  
 Data collected on: Jul 16 2014

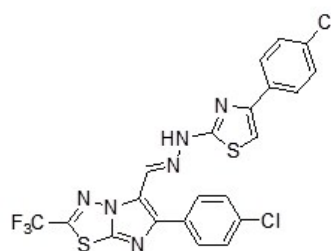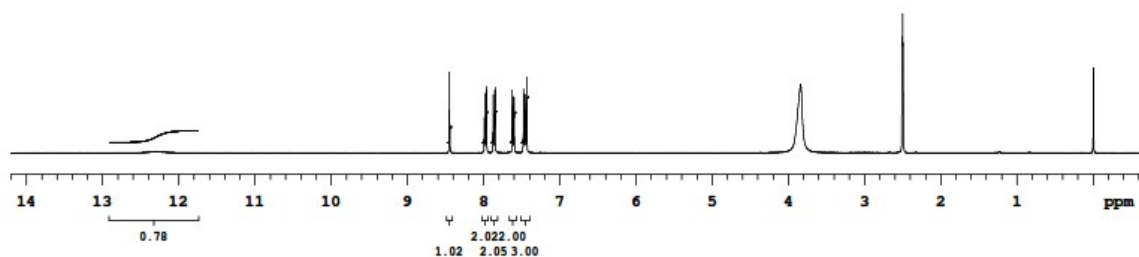

Figure S26.  $^1\text{H}$  NMR spectrum of **5u**

S4-RF-5w in DMSO-d6  
 A.R.NO: NE14G012  
 Sample Name:  
 Data Collected on:  
 localhost.localdomain-vnmrs400  
 Archive directory:  
 Sample directory:  
 FidFile: PROTON  
 Pulse Sequence: PROTON (s2pul)  
 Solvent: dms  
 Data collected on: Jul 16 2014

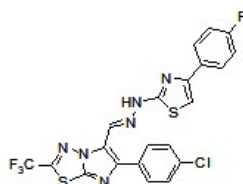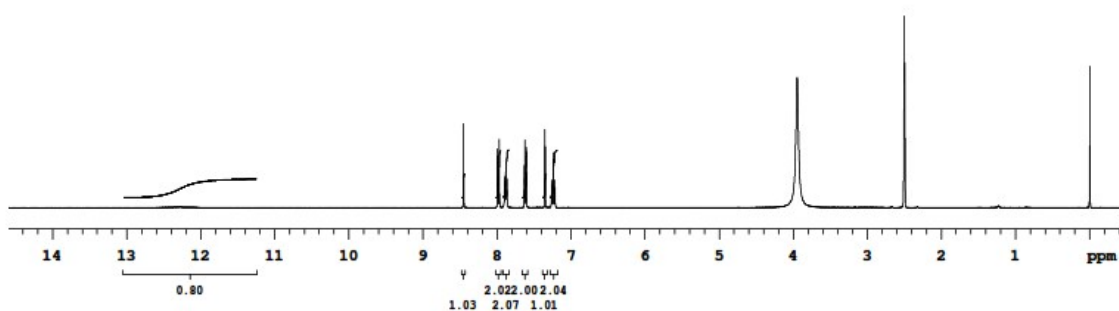

Figure S27.  $^1\text{H}$  NMR of spectrum **5w**
